# Supplementary material for: A highly accurate potential energy surface for carbonyl sulphide (OCS): how important are the ab initio calculations?
Source: Royal Society of Chemistry journal article supplement (doi:10.1039/d4cp01205d), 2024-01-01
Supplement: d4cp01205d1.pdf [file d4cp01205d1.pdf]

# Supplementary Material

A highly accurate potential energy surface for carbonyl sulfide (OCS):  
how important are the *ab initio* calculations?

Alec Owens

*Department of Physics and Astronomy, University College London, Gower Street, WC1E 6BT London, UK*

8 February 2024

Computed rotation-vibration energy levels (in  $\text{cm}^{-1}$ ) of OCS using the empirically refined CBS-HL<sup>ref</sup> and VQZ-F12<sup>ref</sup> PESs compared against the empirically-derived MARVEL energies. The residual errors (observed–calculated) are given in the last two columns. States are labelled by the total angular momentum quantum number  $J$ , the rotationless parity  $e/f$ , and normal mode vibrational quantum numbers for linear triatomic molecules  $v_1, v_2, v_3, L$ . Also given is the uncertainty (unc.) on the empirically-derived MARVEL energy level and the number of transitions (no. trans) that it was established from.

| $J$ | $e/f$ | $v_1$ | $v_2$ | $v_3$ | $L$ | MARVEL     | unc.     | no. trans | VQZ-F12 <sup>ref</sup> (A) | CBS-HL <sup>ref</sup> (B) | o–c (A) | o–c (B) |
|-----|-------|-------|-------|-------|-----|------------|----------|-----------|----------------------------|---------------------------|---------|---------|
| 0   | e     | 0     | 0     | 0     | 0   | 0.0000     | 0.00E+00 | 33        | 0.0000                     | 0.0000                    | 0.0000  | 0.0000  |
| 0   | e     | 1     | 0     | 0     | 0   | 858.9669   | 4.34E-05 | 5         | 859.0197                   | 858.9611                  | -0.0528 | 0.0058  |
| 0   | e     | 0     | 2     | 0     | 0   | 1047.0421  | 1.00E-06 | 7         | 1047.1248                  | 1047.0428                 | -0.0828 | -0.0007 |
| 0   | e     | 2     | 0     | 0     | 0   | 1710.9763  | 1.27E-04 | 5         | 1711.0184                  | 1710.9790                 | -0.0421 | -0.0027 |
| 0   | e     | 1     | 2     | 0     | 0   | 1892.2288  | 3.53E-03 | 2         | 1892.1685                  | 1892.2455                 | 0.0603  | -0.0167 |
| 0   | e     | 0     | 0     | 1     | 0   | 2062.2012  | 5.02E-03 | 2         | 2062.2377                  | 2062.1997                 | -0.0365 | 0.0016  |
| 0   | e     | 0     | 4     | 0     | 0   | 2104.8277  | 1.00E-04 | 4         | 2104.7183                  | 2104.8538                 | 0.1094  | -0.0261 |
| 0   | e     | 3     | 0     | 0     | 0   | 2555.9905  | 5.66E-03 | 1         | 2555.9217                  | 2556.0040                 | 0.0689  | -0.0134 |
| 0   | e     | 1     | 0     | 1     | 0   | 2918.1051  | 5.66E-03 | 1         | 2918.1557                  | 2918.1251                 | -0.0506 | -0.0200 |
| 0   | e     | 0     | 2     | 1     | 0   | 3095.5544  | 3.56E-03 | 1         | 3095.6665                  | 3095.5365                 | -0.1121 | 0.0179  |
| 0   | e     | 2     | 0     | 1     | 0   | 3768.4957  | 1.00E-01 | 1         | 3768.5837                  | 3768.4888                 | -0.0880 | 0.0070  |
| 0   | e     | 1     | 2     | 1     | 0   | 3937.4274  | 3.00E-04 | 2         | 3937.3714                  | 3937.4210                 | 0.0560  | 0.0064  |
| 0   | e     | 0     | 0     | 2     | 0   | 4101.4105  | 2.50E-02 | 2         | 4101.4002                  | 4101.3881                 | 0.0103  | 0.0223  |
| 0   | e     | 0     | 4     | 1     | 0   | 4141.2227  | 2.50E-02 | 1         | 4141.3021                  | 4141.2183                 | -0.0794 | 0.0044  |
| 0   | e     | 1     | 0     | 2     | 0   | 4953.8791  | 3.03E-04 | 2         | 4953.9177                  | 4953.8919                 | -0.0386 | -0.0128 |
| 0   | e     | 0     | 2     | 2     | 0   | 5120.9836  | 4.00E-04 | 2         | 5120.9858                  | 5120.9906                 | -0.0023 | -0.0070 |
| 0   | e     | 2     | 0     | 2     | 0   | 5801.9064  | 6.00E-04 | 1         | 5801.8894                  | 5801.9433                 | 0.0171  | -0.0369 |
| 0   | e     | 0     | 0     | 3     | 0   | 6117.5764  | 6.00E-04 | 3         | 6117.5749                  | 6117.5767                 | 0.0016  | -0.0002 |
| 0   | e     | 3     | 0     | 2     | 0   | 6640.1048  | 4.50E-03 | 1         | 6640.1085                  | 6640.1005                 | -0.0036 | 0.0043  |
| 0   | e     | 2     | 0     | 3     | 0   | 7811.9533  | 4.50E-03 | 1         | 7811.9148                  | 7811.9939                 | 0.0385  | -0.0406 |
| 0   | e     | 0     | 0     | 5     | 0   | 10080.9027 | 1.00E-02 | 1         | 10080.8847                 | 10080.8723                | 0.0180  | 0.0304  |
| 0   | e     | 1     | 2     | 5     | 0   | 11886.1067 | 1.30E-02 | 1         | 11885.9760                 | 11886.0825                | 0.1307  | 0.0242  |
| 1   | e     | 0     | 0     | 0     | 0   | 0.4057     | 3.34E-08 | 83        | 0.4046                     | 0.4057                    | 0.0011  | 0.0000  |
| 1   | e     | 0     | 1     | 0     | 1   | 520.8283   | 2.36E-06 | 26        | 520.8411                   | 520.8291                  | -0.0128 | -0.0008 |
| 1   | e     | 1     | 0     | 0     | 0   | 859.3714   | 4.34E-05 | 19        | 859.4230                   | 859.3656                  | -0.0516 | 0.0059  |
| 1   | e     | 0     | 2     | 0     | 0   | 1047.4490  | 1.00E-06 | 21        | 1047.5307                  | 1047.4497                 | -0.0817 | -0.0006 |
| 1   | e     | 1     | 1     | 0     | 1   | 1372.8643  | 1.31E-04 | 7         | 1372.8802                  | 1372.8685                 | -0.0159 | -0.0042 |
| 1   | e     | 0     | 3     | 0     | 1   | 1573.7736  | 3.18E-06 | 9         | 1573.7722                  | 1573.7724                 | 0.0014  | 0.0012  |
| 1   | e     | 2     | 0     | 0     | 0   | 1711.3796  | 1.27E-04 | 12        | 1711.4204                  | 1711.3822                 | -0.0408 | -0.0027 |
| 1   | e     | 1     | 2     | 0     | 0   | 1892.6347  | 3.53E-03 | 5         | 1892.5732                  | 1892.6513                 | 0.0615  | -0.0166 |
| 1   | e     | 0     | 0     | 1     | 0   | 2062.6045  | 3.55E-03 | 6         | 2062.6399                  | 2062.6029                 | -0.0354 | 0.0016  |
| 1   | e     | 0     | 4     | 0     | 0   | 2105.2356  | 1.00E-04 | 4         | 2105.1251                  | 2105.2616                 | 0.1105  | -0.0260 |

|   |   |   |   |   |   |            |          |     |            |            |         |         |
|---|---|---|---|---|---|------------|----------|-----|------------|------------|---------|---------|
| 1 | e | 2 | 1 | 0 | 1 | 2218.4327  | 5.52E-03 | 2   | 2218.4703  | 2218.4288  | -0.0376 | 0.0039  |
| 1 | e | 1 | 3 | 0 | 1 | 2412.5264  | 2.85E-02 | 3   | 2412.5189  | 2412.5322  | 0.0075  | -0.0059 |
| 1 | e | 3 | 0 | 0 | 0 | 2556.3926  | 4.00E-03 | 3   | 2556.3224  | 2556.4059  | 0.0702  | -0.0134 |
| 1 | e | 0 | 1 | 1 | 1 | 2575.7115  | 3.52E-03 | 1   | 2575.7525  | 2575.7082  | -0.0410 | 0.0033  |
| 1 | e | 2 | 2 | 0 | 0 | 2731.8039  | 4.00E-03 | 1   | 2731.7252  | 2731.8124  | 0.0788  | -0.0085 |
| 1 | e | 1 | 0 | 1 | 0 | 2918.5073  | 4.00E-03 | 2   | 2918.5568  | 2918.5273  | -0.0494 | -0.0200 |
| 1 | e | 0 | 3 | 1 | 1 | 3615.7503  | 3.53E-03 | 1   | 3616.0244  | 3615.7283  | -0.2741 | 0.0220  |
| 1 | e | 2 | 0 | 1 | 0 | 3768.8971  | 1.00E-01 | 2   | 3768.9843  | 3768.8904  | -0.0872 | 0.0067  |
| 1 | e | 1 | 2 | 1 | 0 | 3937.8310  | 3.00E-04 | 2   | 3937.7738  | 3937.8246  | 0.0573  | 0.0065  |
| 1 | e | 1 | 6 | 0 | 0 | 3990.5146  | 3.00E-04 | 1   | 3991.7836  | 3990.5217  | -1.2690 | -0.0070 |
| 1 | e | 0 | 0 | 2 | 0 | 4101.8114  | 2.50E-02 | 4   | 4101.8000  | 4101.7890  | 0.0113  | 0.0223  |
| 1 | e | 0 | 4 | 1 | 0 | 4141.6581  | 2.50E-02 | 2   | 4141.7066  | 4141.6239  | -0.0485 | 0.0342  |
| 1 | e | 3 | 0 | 1 | 0 | 4610.2452  | 3.55E-03 | 1   | 4610.2127  | 4610.2684  | 0.0325  | -0.0232 |
| 1 | e | 2 | 2 | 1 | 0 | 4773.5636  | 5.10E-02 | 2   | 4773.6303  | 4773.5970  | -0.0667 | -0.0335 |
| 1 | e | 1 | 0 | 2 | 0 | 4954.2790  | 4.00E-04 | 3   | 4954.3165  | 4954.2920  | -0.0375 | -0.0130 |
| 1 | e | 1 | 4 | 1 | 0 | 4970.8345  | 4.00E-04 | 1   | 4970.6873  | 4970.8312  | 0.1473  | 0.0033  |
| 1 | e | 0 | 2 | 2 | 0 | 5121.3855  | 4.00E-04 | 2   | 5121.3869  | 5121.3929  | -0.0014 | -0.0074 |
| 1 | e | 2 | 3 | 1 | 1 | 5280.9431  | 4.00E-04 | 1   | 5281.1976  | 5280.9610  | -0.2545 | -0.0180 |
| 1 | e | 2 | 0 | 2 | 0 | 5802.3059  | 4.02E-04 | 3   | 5802.2873  | 5802.3424  | 0.0186  | -0.0365 |
| 1 | e | 1 | 2 | 2 | 0 | 5959.7304  | 6.00E-04 | 1   | 5959.6561  | 5959.7184  | 0.0744  | 0.0121  |
| 1 | e | 0 | 0 | 3 | 0 | 6117.9749  | 6.00E-04 | 5   | 6117.9724  | 6117.9752  | 0.0025  | -0.0002 |
| 1 | e | 5 | 0 | 1 | 0 | 6273.5122  | 4.50E-03 | 1   | 6273.2516  | 6273.4505  | 0.2606  | 0.0617  |
| 1 | e | 4 | 2 | 1 | 0 | 6429.4887  | 4.50E-03 | 1   | 6432.6284  | 6429.8378  | -3.1397 | -0.3491 |
| 1 | e | 0 | 1 | 3 | 1 | 6616.2524  | 6.00E-04 | 1   | 6616.1775  | 6616.2606  | 0.0749  | -0.0082 |
| 1 | e | 3 | 0 | 2 | 0 | 6640.5022  | 4.50E-03 | 1   | 6640.5046  | 6640.4979  | -0.0024 | 0.0042  |
| 1 | e | 1 | 0 | 3 | 0 | 6966.5713  | 1.00E-03 | 2   | 6966.6002  | 6966.5474  | -0.0289 | 0.0239  |
| 1 | e | 3 | 5 | 1 | 1 | 7116.9108  | 5.50E-03 | 1   | 7118.3222  | 7116.9936  | -1.4114 | -0.0828 |
| 1 | e | 1 | 2 | 3 | 0 | 7958.4386  | 4.50E-03 | 1   | 7958.3208  | 7958.3838  | 0.1179  | 0.0548  |
| 1 | e | 0 | 0 | 5 | 0 | 10081.2861 | 1.00E-02 | 2   | 10081.2778 | 10081.2662 | 0.0083  | 0.0199  |
| 1 | e | 0 | 4 | 4 | 0 | 10114.4241 | 1.00E-02 | 1   | 10114.4645 | 10114.4094 | -0.0403 | 0.0148  |
| 1 | e | 2 | 4 | 4 | 0 | 11741.4442 | 5.40E-03 | 2   | 11741.3755 | 11741.6672 | 0.0687  | -0.2230 |
| 1 | e | 2 | 0 | 5 | 0 | 11762.3841 | 1.00E-02 | 1   | 11762.3476 | 11762.3180 | 0.0365  | 0.0662  |
| 1 | e | 1 | 2 | 5 | 0 | 11886.5161 | 1.00E-02 | 1   | 11886.3695 | 11886.4792 | 0.1467  | 0.0369  |
| 1 | e | 0 | 0 | 6 | 0 | 12028.2901 | 1.00E-02 | 1   | 12028.1585 | 12028.3106 | 0.1316  | -0.0205 |
| 1 | e | 2 | 2 | 5 | 0 | 12707.3341 | 1.06E-02 | 1   | 12708.0575 | 12707.2766 | -0.7234 | 0.0575  |
| 1 | f | 0 | 1 | 0 | 1 | 520.8287   | 2.36E-06 | 21  | 520.8415   | 520.8296   | -0.0128 | -0.0008 |
| 1 | f | 1 | 1 | 0 | 1 | 1372.8647  | 6.67E-04 | 7   | 1372.8806  | 1372.8690  | -0.0159 | -0.0043 |
| 1 | f | 0 | 3 | 0 | 1 | 1573.7744  | 3.18E-06 | 10  | 1573.7730  | 1573.7732  | 0.0014  | 0.0012  |
| 1 | f | 2 | 1 | 0 | 1 | 2218.4332  | 5.52E-03 | 2   | 2218.4708  | 2218.4293  | -0.0376 | 0.0039  |
| 1 | f | 1 | 3 | 0 | 1 | 2412.5266  | 2.85E-02 | 3   | 2412.5198  | 2412.5331  | 0.0068  | -0.0065 |
| 1 | f | 0 | 1 | 1 | 1 | 2575.7119  | 3.52E-03 | 1   | 2575.7530  | 2575.7087  | -0.0410 | 0.0033  |
| 1 | f | 1 | 1 | 1 | 1 | 3424.5428  | 3.65E-03 | 1   | 3424.3803  | 3424.5483  | 0.1625  | -0.0055 |
| 1 | f | 0 | 3 | 1 | 1 | 3615.7512  | 3.53E-03 | 1   | 3616.0253  | 3615.7292  | -0.2741 | 0.0220  |
| 1 | f | 0 | 1 | 3 | 1 | 6616.2524  | 6.00E-04 | 1   | 6616.1779  | 6616.2611  | 0.0745  | -0.0087 |
| 1 | f | 3 | 5 | 1 | 1 | 7116.9121  | 5.50E-03 | 1   | 7118.3234  | 7116.9949  | -1.4113 | -0.0829 |
| 2 | e | 0 | 0 | 0 | 0 | 1.2171     | 5.78E-08 | 107 | 1.2139     | 1.2170     | 0.0032  | 0.0001  |
| 2 | e | 0 | 1 | 0 | 1 | 521.6407   | 2.13E-06 | 41  | 521.6514   | 521.6415   | -0.0107 | -0.0007 |
| 2 | e | 1 | 0 | 0 | 0 | 860.1804   | 4.34E-05 | 15  | 860.2297   | 860.1745   | -0.0493 | 0.0059  |
| 2 | e | 0 | 2 | 0 | 2 | 1042.5109  | 1.44E-02 | 5   | 1042.5853  | 1042.5132  | -0.0744 | -0.0022 |
| 2 | e | 0 | 2 | 0 | 0 | 1048.2629  | 1.00E-06 | 19  | 1048.3424  | 1048.2634  | -0.0795 | -0.0005 |
| 2 | e | 1 | 1 | 0 | 1 | 1373.6745  | 1.30E-04 | 11  | 1373.6880  | 1373.6786  | -0.0135 | -0.0041 |
| 2 | e | 0 | 3 | 0 | 1 | 1574.5878  | 3.18E-06 | 11  | 1574.5842  | 1574.5864  | 0.0036  | 0.0014  |
| 2 | e | 2 | 0 | 0 | 0 | 1712.1861  | 1.27E-04 | 9   | 1712.2244  | 1712.1887  | -0.0383 | -0.0026 |
| 2 | e | 1 | 2 | 0 | 2 | 1888.1629  | 1.58E-02 | 2   | 1888.2514  | 1888.1554  | -0.0885 | 0.0075  |
| 2 | e | 1 | 2 | 0 | 0 | 1893.4465  | 3.53E-03 | 5   | 1893.3826  | 1893.4630  | 0.0639  | -0.0165 |
| 2 | e | 0 | 0 | 1 | 0 | 2063.4111  | 3.55E-03 | 6   | 2063.4444  | 2063.4095  | -0.0333 | 0.0016  |
| 2 | e | 0 | 4 | 0 | 2 | 2100.7452  | 1.44E-02 | 3   | 2100.7615  | 2100.7556  | -0.0163 | -0.0103 |

|   |   |   |   |   |   |            |          |    |            |            |         |         |
|---|---|---|---|---|---|------------|----------|----|------------|------------|---------|---------|
| 2 | e | 0 | 4 | 0 | 0 | 2106.0516  | 1.00E-04 | 4  | 2105.9388  | 2106.0773  | 0.1127  | -0.0258 |
| 2 | e | 2 | 1 | 0 | 1 | 2219.2405  | 3.90E-03 | 4  | 2219.2756  | 2219.2365  | -0.0351 | 0.0040  |
| 2 | e | 1 | 3 | 0 | 1 | 2413.3385  | 2.85E-02 | 4  | 2413.3287  | 2413.3442  | 0.0099  | -0.0057 |
| 2 | e | 3 | 0 | 0 | 0 | 2557.1966  | 4.00E-03 | 2  | 2557.1237  | 2557.2098  | 0.0729  | -0.0133 |
| 2 | e | 0 | 1 | 1 | 1 | 2576.5196  | 4.30E-03 | 3  | 2576.5580  | 2576.5159  | -0.0384 | 0.0038  |
| 2 | e | 0 | 5 | 0 | 1 | 2636.8151  | 5.00E-03 | 3  | 2636.8293  | 2636.7857  | -0.0142 | 0.0294  |
| 2 | e | 2 | 2 | 0 | 0 | 2732.6136  | 4.00E-03 | 2  | 2732.5323  | 2732.6219  | 0.0814  | -0.0082 |
| 2 | e | 1 | 0 | 1 | 0 | 2919.3117  | 3.53E-03 | 1  | 2919.3588  | 2919.3317  | -0.0471 | -0.0200 |
| 2 | e | 1 | 4 | 0 | 0 | 2938.3675  | 4.00E-03 | 1  | 2938.2846  | 2938.3207  | 0.0830  | 0.0469  |
| 2 | e | 1 | 1 | 1 | 1 | 3425.3474  | 1.67E-04 | 1  | 3425.1829  | 3425.3533  | 0.1645  | -0.0059 |
| 2 | e | 0 | 3 | 1 | 1 | 3616.5599  | 3.53E-03 | 1  | 3616.8316  | 3616.5378  | -0.2717 | 0.0221  |
| 2 | e | 2 | 4 | 0 | 0 | 3764.0412  | 3.55E-03 | 1  | 3764.1914  | 3763.9816  | -0.1502 | 0.0596  |
| 2 | e | 2 | 0 | 1 | 0 | 3769.7023  | 3.55E-03 | 3  | 3769.7855  | 3769.6936  | -0.0832 | 0.0086  |
| 2 | e | 1 | 2 | 1 | 2 | 3932.5093  | 1.62E-02 | 1  | 3932.6018  | 3932.5536  | -0.0925 | -0.0443 |
| 2 | e | 1 | 2 | 1 | 0 | 3938.6384  | 3.00E-04 | 2  | 3938.5785  | 3938.6318  | 0.0600  | 0.0066  |
| 2 | e | 0 | 0 | 2 | 0 | 4102.6131  | 2.50E-02 | 3  | 4102.5997  | 4102.5908  | 0.0134  | 0.0223  |
| 2 | e | 0 | 4 | 1 | 0 | 4142.4010  | 2.50E-02 | 2  | 4142.5154  | 4142.4351  | -0.1145 | -0.0341 |
| 2 | e | 1 | 3 | 1 | 1 | 4451.9713  | 3.00E-04 | 1  | 4452.0348  | 4451.9761  | -0.0635 | -0.0048 |
| 2 | e | 3 | 0 | 1 | 0 | 4611.0448  | 3.55E-03 | 1  | 4611.0095  | 4611.0678  | 0.0353  | -0.0230 |
| 2 | e | 2 | 2 | 1 | 0 | 4774.4269  | 3.03E-04 | 3  | 4774.4329  | 4774.4023  | -0.0060 | 0.0246  |
| 2 | e | 1 | 0 | 2 | 0 | 4955.1150  | 2.50E-02 | 2  | 4955.1141  | 4955.0920  | 0.0009  | 0.0230  |
| 2 | e | 1 | 4 | 1 | 0 | 4971.6432  | 3.00E-04 | 2  | 4971.4937  | 4971.6401  | 0.1495  | 0.0032  |
| 2 | e | 0 | 2 | 2 | 0 | 5122.1901  | 3.00E-04 | 4  | 5122.1890  | 5122.1974  | 0.0011  | -0.0073 |
| 2 | e | 2 | 3 | 1 | 1 | 5281.7497  | 5.15E-04 | 2  | 5282.0005  | 5281.7667  | -0.2508 | -0.0170 |
| 2 | e | 1 | 1 | 2 | 1 | 5453.6638  | 3.27E-04 | 2  | 5453.3391  | 5453.6542  | 0.3247  | 0.0096  |
| 2 | e | 0 | 3 | 2 | 1 | 5635.4527  | 3.00E-04 | 1  | 5635.8169  | 5635.4384  | -0.3642 | 0.0143  |
| 2 | e | 2 | 4 | 1 | 0 | 5793.2067  | 4.02E-04 | 2  | 5793.4240  | 5793.1944  | -0.2173 | 0.0123  |
| 2 | e | 2 | 0 | 2 | 0 | 5803.1045  | 4.05E-04 | 2  | 5803.0832  | 5803.1406  | 0.0213  | -0.0361 |
| 2 | e | 1 | 2 | 2 | 0 | 5960.5335  | 6.00E-04 | 2  | 5960.4562  | 5960.5211  | 0.0774  | 0.0124  |
| 2 | e | 0 | 0 | 3 | 0 | 6118.7719  | 4.02E-04 | 5  | 6118.7674  | 6118.7722  | 0.0045  | -0.0003 |
| 2 | e | 0 | 4 | 2 | 0 | 6155.9103  | 6.00E-04 | 2  | 6156.0637  | 6155.9206  | -0.1534 | -0.0103 |
| 2 | e | 0 | 1 | 3 | 1 | 6617.0509  | 6.00E-04 | 1  | 6616.9734  | 6617.0588  | 0.0775  | -0.0079 |
| 2 | e | 3 | 0 | 2 | 0 | 6641.2987  | 1.00E-03 | 2  | 6641.2968  | 6641.2928  | 0.0019  | 0.0059  |
| 2 | e | 1 | 0 | 3 | 0 | 6967.3674  | 1.00E-03 | 2  | 6967.3938  | 6967.3435  | -0.0264 | 0.0239  |
| 2 | e | 2 | 4 | 2 | 0 | 7799.1646  | 5.50E-03 | 1  | 7799.4170  | 7799.2370  | -0.2524 | -0.0724 |
| 2 | e | 2 | 0 | 3 | 0 | 7813.1438  | 4.50E-03 | 1  | 7813.1013  | 7813.1839  | 0.0425  | -0.0401 |
| 2 | e | 1 | 2 | 3 | 0 | 7959.2371  | 4.50E-03 | 1  | 7959.1163  | 7959.1823  | 0.1207  | 0.0548  |
| 2 | e | 0 | 0 | 4 | 0 | 8111.9223  | 5.50E-03 | 1  | 8111.9526  | 8111.9313  | -0.0303 | -0.0089 |
| 2 | e | 1 | 2 | 4 | 0 | 9934.7273  | 1.00E-02 | 1  | 9934.6492  | 9934.7099  | 0.0781  | 0.0174  |
| 2 | e | 0 | 0 | 5 | 0 | 10082.0795 | 1.00E-02 | 2  | 10082.0639 | 10082.0541 | 0.0156  | 0.0254  |
| 2 | e | 0 | 4 | 4 | 0 | 10115.2170 | 1.00E-02 | 2  | 10115.2587 | 10115.2070 | -0.0418 | 0.0100  |
| 2 | e | 0 | 1 | 5 | 1 | 10565.4743 | 1.00E-02 | 4  | 10565.4580 | 10565.4556 | 0.0164  | 0.0188  |
| 2 | e | 1 | 0 | 5 | 0 | 10921.1777 | 1.38E-02 | 1  | 10920.7595 | 10921.0878 | 0.4182  | 0.0900  |
| 2 | e | 1 | 4 | 4 | 0 | 10936.1533 | 1.68E-02 | 1  | 10935.8447 | 10936.1623 | 0.3086  | -0.0090 |
| 2 | e | 2 | 4 | 4 | 0 | 11742.2300 | 5.00E-03 | 2  | 11742.1673 | 11742.4617 | 0.0628  | -0.2317 |
| 2 | e | 2 | 0 | 5 | 0 | 11763.1755 | 1.00E-02 | 2  | 11763.1293 | 11763.1021 | 0.0462  | 0.0734  |
| 2 | e | 1 | 2 | 5 | 0 | 11887.3023 | 1.00E-02 | 1  | 11887.1564 | 11887.2733 | 0.1459  | 0.0290  |
| 2 | e | 0 | 0 | 6 | 0 | 12029.0977 | 1.00E-02 | 1  | 12028.9406 | 12029.0941 | 0.1571  | 0.0036  |
| 2 | e | 2 | 2 | 5 | 0 | 12708.1419 | 1.00E-02 | 2  | 12708.8436 | 12708.0653 | -0.7018 | 0.0766  |
| 2 | e | 1 | 1 | 6 | 1 | 13333.3959 | 5.00E-03 | 2  | 13333.3593 | 13333.4164 | 0.0366  | -0.0205 |
| 2 | e | 0 | 0 | 7 | 0 | 13953.0053 | 1.00E-02 | 1  | 13952.4538 | 13952.9871 | 0.5515  | 0.0182  |
| 2 | f | 0 | 1 | 0 | 1 | 521.6420   | 2.13E-06 | 33 | 521.6527   | 521.6428   | -0.0107 | -0.0008 |
| 2 | f | 0 | 2 | 0 | 2 | 1042.5109  | 1.44E-02 | 4  | 1042.5853  | 1042.5132  | -0.0744 | -0.0022 |
| 2 | f | 1 | 1 | 0 | 1 | 1373.6758  | 6.67E-04 | 11 | 1373.6894  | 1373.6800  | -0.0136 | -0.0042 |
| 2 | f | 0 | 3 | 0 | 1 | 1574.5903  | 3.18E-06 | 13 | 1574.5867  | 1574.5889  | 0.0036  | 0.0014  |
| 2 | f | 1 | 2 | 0 | 2 | 1888.1629  | 1.58E-02 | 2  | 1888.2514  | 1888.1554  | -0.0885 | 0.0075  |
| 2 | f | 0 | 4 | 0 | 2 | 2100.7452  | 1.44E-02 | 3  | 2100.7615  | 2100.7556  | -0.0163 | -0.0103 |

|   |   |   |   |   |   |            |          |     |            |            |         |         |
|---|---|---|---|---|---|------------|----------|-----|------------|------------|---------|---------|
| 2 | f | 2 | 1 | 0 | 1 | 2219.2420  | 3.90E-03 | 4   | 2219.2770  | 2219.2380  | -0.0350 | 0.0041  |
| 2 | f | 1 | 3 | 0 | 1 | 2413.3405  | 2.85E-02 | 4   | 2413.3313  | 2413.3469  | 0.0093  | -0.0063 |
| 2 | f | 0 | 1 | 1 | 1 | 2576.5204  | 6.08E-03 | 2   | 2576.5593  | 2576.5172  | -0.0389 | 0.0032  |
| 2 | f | 0 | 5 | 0 | 1 | 2636.8177  | 5.00E-03 | 3   | 2636.8329  | 2636.7893  | -0.0152 | 0.0283  |
| 2 | f | 1 | 1 | 1 | 1 | 3425.3500  | 1.67E-04 | 1   | 3425.1843  | 3425.3547  | 0.1657  | -0.0048 |
| 2 | f | 0 | 3 | 1 | 1 | 3616.5625  | 3.53E-03 | 1   | 3616.8341  | 3616.5404  | -0.2717 | 0.0221  |
| 2 | f | 2 | 3 | 1 | 1 | 5281.7516  | 4.00E-04 | 1   | 5282.0034  | 5281.7696  | -0.2518 | -0.0180 |
| 2 | f | 1 | 1 | 2 | 1 | 5453.6657  | 4.00E-04 | 1   | 5453.3405  | 5453.6557  | 0.3252  | 0.0100  |
| 2 | f | 2 | 1 | 2 | 1 | 6292.1150  | 6.00E-04 | 1   | 6291.8072  | 6292.0272  | 0.3077  | 0.0878  |
| 2 | f | 0 | 1 | 3 | 1 | 6617.0518  | 6.00E-04 | 2   | 6616.9747  | 6617.0601  | 0.0771  | -0.0083 |
| 2 | f | 1 | 1 | 6 | 1 | 13333.3981 | 5.00E-03 | 2   | 13333.1270 | 13333.4185 | 0.2711  | -0.0203 |
| 3 | e | 0 | 0 | 0 | 0 | 2.4343     | 7.58E-08 | 103 | 2.4278     | 2.4341     | 0.0065  | 0.0002  |
| 3 | e | 0 | 1 | 0 | 1 | 522.8594   | 2.13E-06 | 38  | 522.8669   | 522.8600   | -0.0075 | -0.0006 |
| 3 | e | 1 | 0 | 0 | 0 | 861.3939   | 4.34E-05 | 12  | 861.4397   | 861.3879   | -0.0458 | 0.0060  |
| 3 | e | 0 | 2 | 0 | 2 | 1043.7323  | 1.35E-02 | 9   | 1043.8035  | 1043.7343  | -0.0712 | -0.0020 |
| 3 | e | 0 | 2 | 0 | 0 | 1049.4838  | 1.00E-06 | 21  | 1049.5600  | 1049.4841  | -0.0762 | -0.0003 |
| 3 | e | 1 | 1 | 0 | 1 | 1374.8898  | 1.30E-04 | 9   | 1374.8997  | 1374.8937  | -0.0100 | -0.0039 |
| 3 | e | 0 | 3 | 0 | 1 | 1575.8092  | 3.18E-06 | 5   | 1575.8023  | 1575.8076  | 0.0069  | 0.0016  |
| 3 | e | 2 | 0 | 0 | 0 | 1713.3959  | 1.27E-04 | 5   | 1713.4304  | 1713.3984  | -0.0345 | -0.0025 |
| 3 | e | 1 | 2 | 0 | 2 | 1889.3812  | 1.45E-02 | 4   | 1889.4661  | 1889.3735  | -0.0849 | 0.0077  |
| 3 | e | 1 | 2 | 0 | 0 | 1894.6661  | 1.34E-04 | 3   | 1894.5967  | 1894.6804  | 0.0694  | -0.0143 |
| 3 | e | 0 | 0 | 1 | 0 | 2064.6206  | 1.58E-06 | 4   | 2064.6511  | 2064.6193  | -0.0305 | 0.0012  |
| 3 | e | 0 | 4 | 0 | 2 | 2101.9695  | 1.35E-02 | 5   | 2101.9825  | 2101.9796  | -0.0130 | -0.0101 |
| 3 | e | 0 | 4 | 0 | 0 | 2107.2743  | 1.00E-03 | 2   | 2107.1593  | 2107.3009  | 0.1150  | -0.0266 |
| 3 | e | 2 | 1 | 0 | 1 | 2220.4534  | 3.90E-03 | 1   | 2220.4836  | 2220.4481  | -0.0301 | 0.0053  |
| 3 | e | 1 | 3 | 0 | 1 | 2414.5589  | 2.00E-04 | 3   | 2414.5433  | 2414.5622  | 0.0156  | -0.0033 |
| 3 | e | 3 | 0 | 0 | 0 | 2558.4030  | 4.00E-03 | 2   | 2558.3258  | 2558.4157  | 0.0772  | -0.0128 |
| 3 | e | 0 | 1 | 1 | 1 | 2577.7311  | 4.30E-03 | 3   | 2577.7662  | 2577.7273  | -0.0351 | 0.0038  |
| 3 | e | 0 | 5 | 0 | 1 | 2638.0385  | 5.00E-03 | 3   | 2638.0494  | 2638.0088  | -0.0109 | 0.0296  |
| 3 | e | 2 | 2 | 0 | 0 | 2733.8281  | 4.00E-03 | 2   | 2733.7429  | 2733.8361  | 0.0852  | -0.0079 |
| 3 | e | 1 | 0 | 1 | 0 | 2920.5184  | 4.00E-03 | 1   | 2920.5618  | 2920.5382  | -0.0434 | -0.0198 |
| 3 | e | 1 | 4 | 0 | 2 | 2934.6561  | 1.57E-02 | 1   | 2934.8311  | 2934.6098  | -0.1750 | 0.0464  |
| 3 | e | 1 | 4 | 0 | 0 | 2939.5881  | 4.00E-03 | 1   | 2939.5017  | 2939.5410  | 0.0865  | 0.0471  |
| 3 | e | 0 | 2 | 1 | 2 | 3091.3335  | 1.42E-02 | 1   | 3091.6698  | 3091.3856  | -0.3364 | -0.0521 |
| 3 | e | 0 | 2 | 1 | 0 | 3097.9821  | 4.00E-03 | 2   | 3098.0872  | 3097.9639  | -0.1051 | 0.0182  |
| 3 | e | 2 | 0 | 1 | 0 | 3770.9226  | 1.00E-01 | 2   | 3770.9872  | 3770.8985  | -0.0646 | 0.0241  |
| 3 | e | 1 | 2 | 1 | 0 | 3939.8494  | 3.00E-04 | 3   | 3939.7855  | 3939.8426  | 0.0639  | 0.0069  |
| 3 | e | 0 | 0 | 2 | 0 | 4103.7611  | 2.50E-02 | 2   | 4103.7993  | 4103.7934  | -0.0381 | -0.0323 |
| 3 | e | 0 | 4 | 1 | 0 | 4143.6677  | 2.50E-02 | 2   | 4143.7287  | 4143.6518  | -0.0610 | 0.0159  |
| 3 | e | 1 | 3 | 1 | 1 | 4453.1834  | 3.00E-04 | 1   | 4453.2424  | 4453.1875  | -0.0590 | -0.0041 |
| 3 | e | 0 | 1 | 2 | 1 | 4609.5174  | 6.88E-04 | 2   | 4609.4927  | 4609.5195  | 0.0247  | -0.0021 |
| 3 | e | 2 | 2 | 1 | 0 | 4775.6171  | 2.50E-02 | 1   | 4775.6369  | 4775.6103  | -0.0197 | 0.0068  |
| 3 | e | 1 | 0 | 2 | 0 | 4956.2795  | 4.00E-04 | 4   | 4956.3105  | 4956.2920  | -0.0310 | -0.0125 |
| 3 | e | 1 | 4 | 1 | 0 | 4972.8565  | 3.03E-04 | 3   | 4972.7034  | 4972.8534  | 0.1531  | 0.0031  |
| 3 | e | 0 | 2 | 2 | 0 | 5123.3969  | 4.00E-04 | 4   | 5123.3921  | 5123.4042  | 0.0048  | -0.0073 |
| 3 | e | 2 | 3 | 1 | 1 | 5282.9592  | 1.10E-03 | 2   | 5283.2050  | 5282.9752  | -0.2458 | -0.0160 |
| 3 | e | 4 | 0 | 1 | 0 | 5447.3513  | 4.00E-04 | 1   | 5447.2018  | 5447.3491  | 0.1495  | 0.0022  |
| 3 | e | 1 | 1 | 2 | 1 | 5454.8657  | 4.00E-04 | 1   | 5454.5368  | 5454.8557  | 0.3290  | 0.0100  |
| 3 | e | 0 | 3 | 2 | 1 | 5636.6504  | 4.00E-04 | 1   | 5637.0205  | 5636.6459  | -0.3701 | 0.0045  |
| 3 | e | 2 | 4 | 1 | 0 | 5794.4171  | 4.02E-04 | 2   | 5794.6295  | 5794.4044  | -0.2124 | 0.0127  |
| 3 | e | 2 | 0 | 2 | 0 | 5804.3015  | 4.02E-04 | 3   | 5804.2770  | 5804.3378  | 0.0245  | -0.0363 |
| 3 | e | 1 | 2 | 2 | 2 | 5954.6753  | 1.35E-02 | 1   | 5954.7158  | 5954.7839  | -0.0404 | -0.1086 |
| 3 | e | 1 | 2 | 2 | 0 | 5961.7380  | 6.00E-04 | 2   | 5961.6563  | 5961.7253  | 0.0817  | 0.0127  |
| 3 | e | 0 | 0 | 3 | 0 | 6119.9674  | 6.00E-04 | 4   | 6119.9599  | 6119.9677  | 0.0075  | -0.0003 |
| 3 | e | 0 | 4 | 2 | 0 | 6157.1204  | 6.00E-04 | 2   | 6157.2697  | 6157.1305  | -0.1493 | -0.0100 |
| 3 | e | 5 | 0 | 1 | 0 | 6275.4995  | 4.50E-03 | 1   | 6275.2302  | 6275.4362  | 0.2694  | 0.0633  |
| 3 | e | 2 | 1 | 2 | 1 | 6293.3135  | 4.21E-04 | 2   | 6293.0005  | 6293.2249  | 0.3130  | 0.0886  |

|   |   |   |   |   |   |            |          |     |            |            |         |         |
|---|---|---|---|---|---|------------|----------|-----|------------|------------|---------|---------|
| 3 | e | 0 | 1 | 3 | 1 | 6618.2491  | 6.00E-04 | 1   | 6618.1673  | 6618.2560  | 0.0817  | -0.0069 |
| 3 | e | 3 | 0 | 2 | 0 | 6642.4887  | 1.00E-03 | 3   | 6642.4852  | 6642.4851  | 0.0035  | 0.0036  |
| 3 | e | 1 | 0 | 3 | 0 | 6968.5616  | 1.00E-03 | 4   | 6968.5842  | 6968.5377  | -0.0225 | 0.0240  |
| 3 | e | 0 | 2 | 3 | 0 | 7125.7772  | 6.00E-04 | 2   | 7125.6010  | 7125.8371  | 0.1763  | -0.0598 |
| 3 | e | 4 | 0 | 2 | 0 | 7474.5566  | 5.50E-03 | 1   | 7474.6657  | 7474.4836  | -0.1091 | 0.0730  |
| 3 | e | 2 | 1 | 3 | 1 | 8294.2201  | 5.50E-03 | 1   | 8294.0097  | 8294.0985  | 0.2104  | 0.1216  |
| 3 | e | 1 | 3 | 3 | 1 | 8460.7769  | 7.50E-03 | 1   | 8460.7733  | 8460.8114  | 0.0035  | -0.0345 |
| 3 | e | 1 | 0 | 4 | 0 | 8957.2501  | 1.00E-02 | 1   | 8957.1634  | 8957.1735  | 0.0867  | 0.0766  |
| 3 | e | 0 | 0 | 5 | 0 | 10083.2646 | 1.00E-02 | 2   | 10083.2431 | 10083.2359 | 0.0216  | 0.0287  |
| 3 | e | 0 | 4 | 4 | 0 | 10116.4101 | 1.00E-02 | 2   | 10116.4502 | 10116.4035 | -0.0400 | 0.0066  |
| 3 | e | 0 | 1 | 5 | 1 | 10566.6540 | 1.00E-02 | 4   | 10566.6379 | 10566.6387 | 0.0160  | 0.0153  |
| 3 | e | 1 | 0 | 5 | 0 | 10922.3761 | 1.00E-02 | 2   | 10921.9404 | 10922.2720 | 0.4357  | 0.1041  |
| 3 | e | 1 | 4 | 4 | 0 | 10937.3331 | 1.00E-02 | 1   | 10937.0290 | 10937.3507 | 0.3041  | -0.0176 |
| 3 | e | 2 | 4 | 4 | 0 | 11743.4233 | 5.62E-03 | 2   | 11743.3550 | 11743.6535 | 0.0683  | -0.2302 |
| 3 | e | 2 | 0 | 5 | 0 | 11764.3379 | 1.00E-02 | 2   | 11764.3019 | 11764.2782 | 0.0360  | 0.0597  |
| 3 | e | 1 | 2 | 5 | 0 | 11888.4921 | 1.00E-02 | 1   | 11888.3367 | 11888.4665 | 0.1554  | 0.0256  |
| 3 | e | 0 | 0 | 6 | 0 | 12030.2776 | 1.00E-02 | 2   | 12030.1138 | 12030.2693 | 0.1638  | 0.0083  |
| 3 | e | 1 | 1 | 6 | 1 | 13334.5743 | 5.00E-03 | 2   | 13334.5332 | 13334.5919 | 0.0411  | -0.0176 |
| 3 | e | 0 | 0 | 7 | 0 | 13954.1731 | 1.00E-02 | 1   | 13953.6231 | 13954.1563 | 0.5500  | 0.0168  |
| 3 | f | 0 | 1 | 0 | 1 | 522.8619   | 2.13E-06 | 32  | 522.8694   | 522.8625   | -0.0075 | -0.0006 |
| 3 | f | 0 | 2 | 0 | 2 | 1043.7323  | 1.35E-02 | 8   | 1043.8035  | 1043.7343  | -0.0712 | -0.0020 |
| 3 | f | 1 | 1 | 0 | 1 | 1374.8924  | 6.67E-04 | 6   | 1374.9025  | 1374.8964  | -0.0100 | -0.0040 |
| 3 | f | 0 | 3 | 0 | 1 | 1575.8141  | 3.18E-06 | 4   | 1575.8072  | 1575.8125  | 0.0069  | 0.0016  |
| 3 | f | 1 | 2 | 0 | 2 | 1889.3812  | 1.45E-02 | 3   | 1889.4661  | 1889.3735  | -0.0849 | 0.0077  |
| 3 | f | 0 | 4 | 0 | 2 | 2101.9695  | 1.35E-02 | 5   | 2101.9825  | 2101.9796  | -0.0130 | -0.0101 |
| 3 | f | 2 | 1 | 0 | 1 | 2220.4564  | 3.90E-03 | 1   | 2220.4865  | 2220.4511  | -0.0301 | 0.0054  |
| 3 | f | 1 | 3 | 0 | 1 | 2414.5642  | 2.00E-04 | 3   | 2414.5485  | 2414.5675  | 0.0157  | -0.0033 |
| 3 | f | 0 | 1 | 1 | 1 | 2577.7331  | 4.30E-03 | 3   | 2577.7687  | 2577.7299  | -0.0356 | 0.0033  |
| 3 | f | 0 | 5 | 0 | 1 | 2638.0447  | 5.00E-03 | 3   | 2638.0566  | 2638.0161  | -0.0120 | 0.0286  |
| 3 | f | 1 | 2 | 1 | 2 | 3933.7207  | 1.49E-02 | 1   | 3933.8093  | 3933.7649  | -0.0886 | -0.0442 |
| 3 | f | 2 | 3 | 1 | 1 | 5282.9626  | 4.00E-04 | 1   | 5283.2106  | 5282.9810  | -0.2480 | -0.0184 |
| 3 | f | 1 | 1 | 2 | 1 | 5454.8685  | 4.00E-04 | 1   | 5454.5396  | 5454.8587  | 0.3289  | 0.0098  |
| 3 | f | 0 | 1 | 3 | 1 | 6618.2508  | 6.00E-04 | 2   | 6618.1699  | 6618.2587  | 0.0809  | -0.0079 |
| 3 | f | 3 | 1 | 2 | 1 | 7129.2848  | 5.50E-03 | 1   | 7129.7216  | 7129.6376  | -0.4368 | -0.3529 |
| 3 | f | 1 | 1 | 6 | 1 | 13334.5782 | 5.00E-03 | 2   | 13334.5381 | 13334.5960 | 0.0402  | -0.0178 |
| 4 | e | 0 | 0 | 0 | 0 | 4.0571     | 9.62E-08 | 119 | 4.0463     | 4.0568     | 0.0108  | 0.0003  |
| 4 | e | 0 | 1 | 0 | 1 | 524.4842   | 2.13E-06 | 40  | 524.4874   | 524.4847   | -0.0033 | -0.0005 |
| 4 | e | 1 | 0 | 0 | 0 | 863.0119   | 4.34E-05 | 19  | 863.0530   | 863.0057   | -0.0411 | 0.0062  |
| 4 | e | 0 | 2 | 0 | 2 | 1045.3608  | 1.25E-02 | 10  | 1045.4277  | 1045.3626  | -0.0670 | -0.0018 |
| 4 | e | 0 | 2 | 0 | 0 | 1051.1116  | 1.00E-06 | 22  | 1051.1835  | 1051.1116  | -0.0718 | 0.0000  |
| 4 | e | 1 | 1 | 0 | 1 | 1376.5101  | 1.30E-04 | 8   | 1376.5154  | 1376.5138  | -0.0053 | -0.0037 |
| 4 | e | 0 | 3 | 0 | 1 | 1577.4376  | 2.47E-06 | 5   | 1577.4263  | 1577.4357  | 0.0113  | 0.0019  |
| 4 | e | 2 | 0 | 0 | 0 | 1715.0090  | 1.27E-04 | 6   | 1715.0385  | 1715.0113  | -0.0295 | -0.0023 |
| 4 | e | 1 | 2 | 0 | 2 | 1891.0056  | 1.30E-02 | 4   | 1891.0857  | 1890.9976  | -0.0802 | 0.0080  |
| 4 | e | 1 | 2 | 0 | 0 | 1896.2897  | 1.34E-04 | 4   | 1896.2155  | 1896.3037  | 0.0742  | -0.0140 |
| 4 | e | 0 | 0 | 1 | 0 | 2066.2337  | 1.12E-06 | 7   | 2066.2600  | 2066.2324  | -0.0263 | 0.0013  |
| 4 | e | 0 | 4 | 0 | 2 | 2103.6034  | 1.25E-02 | 4   | 2103.6106  | 2103.6117  | -0.0071 | -0.0083 |
| 4 | e | 0 | 4 | 0 | 0 | 2108.9060  | 1.00E-03 | 4   | 2108.7867  | 2108.9323  | 0.1193  | -0.0262 |
| 4 | e | 2 | 1 | 0 | 1 | 2222.0684  | 3.90E-03 | 2   | 2222.0942  | 2222.0636  | -0.0258 | 0.0048  |
| 4 | e | 1 | 3 | 0 | 1 | 2416.1832  | 2.00E-04 | 4   | 2416.1628  | 2416.1862  | 0.0204  | -0.0030 |
| 4 | e | 3 | 0 | 0 | 0 | 2560.0120  | 4.00E-03 | 4   | 2559.9285  | 2560.0236  | 0.0835  | -0.0116 |
| 4 | e | 0 | 1 | 1 | 1 | 2579.3462  | 6.08E-03 | 2   | 2579.3771  | 2579.3425  | -0.0310 | 0.0037  |
| 4 | e | 0 | 5 | 0 | 1 | 2639.6678  | 5.00E-03 | 2   | 2639.6762  | 2639.6396  | -0.0084 | 0.0282  |
| 4 | e | 2 | 2 | 0 | 0 | 2735.4474  | 4.00E-03 | 2   | 2735.3571  | 2735.4550  | 0.0904  | -0.0076 |
| 4 | e | 1 | 0 | 1 | 0 | 2922.1293  | 4.00E-03 | 2   | 2922.1658  | 2922.1470  | -0.0366 | -0.0177 |
| 4 | e | 0 | 2 | 1 | 0 | 3099.6003  | 4.00E-03 | 3   | 3099.7010  | 3099.5822  | -0.1007 | 0.0181  |
| 4 | e | 0 | 6 | 0 | 0 | 3174.7275  | 8.50E-03 | 1   | 3175.2327  | 3174.7747  | -0.5052 | -0.0472 |

|   |   |   |   |   |   |            |          |    |            |            |         |         |
|---|---|---|---|---|---|------------|----------|----|------------|------------|---------|---------|
| 4 | e | 2 | 3 | 0 | 1 | 3249.3111  | 3.57E-03 | 1  | 3249.4752  | 3249.3048  | -0.1642 | 0.0063  |
| 4 | e | 2 | 0 | 1 | 0 | 3772.5527  | 1.00E-01 | 1  | 3772.5896  | 3772.5050  | -0.0370 | 0.0476  |
| 4 | e | 1 | 2 | 1 | 0 | 3941.4641  | 3.00E-04 | 3  | 3941.3949  | 3941.4570  | 0.0691  | 0.0071  |
| 4 | e | 1 | 6 | 0 | 0 | 3994.1844  | 3.00E-04 | 1  | 3995.4427  | 3994.1907  | -1.2584 | -0.0063 |
| 4 | e | 0 | 0 | 2 | 0 | 4105.3952  | 3.00E-04 | 3  | 4105.3986  | 4105.3970  | -0.0035 | -0.0018 |
| 4 | e | 0 | 4 | 1 | 0 | 4145.3180  | 2.50E-02 | 2  | 4145.3464  | 4145.2742  | -0.0284 | 0.0438  |
| 4 | e | 1 | 3 | 1 | 1 | 4454.7987  | 3.00E-04 | 2  | 4454.8525  | 4454.8027  | -0.0538 | -0.0040 |
| 4 | e | 0 | 1 | 2 | 1 | 4611.1229  | 9.13E-04 | 2  | 4611.0941  | 4611.1252  | 0.0289  | -0.0023 |
| 4 | e | 3 | 0 | 1 | 0 | 4613.8428  | 3.55E-03 | 1  | 4613.7982  | 4613.8656  | 0.0446  | -0.0227 |
| 4 | e | 2 | 2 | 1 | 0 | 4777.2462  | 3.03E-04 | 3  | 4777.2421  | 4777.2209  | 0.0041  | 0.0253  |
| 4 | e | 1 | 0 | 2 | 0 | 4957.8796  | 4.00E-04 | 4  | 4957.9056  | 4957.8921  | -0.0261 | -0.0125 |
| 4 | e | 1 | 4 | 1 | 0 | 4974.4749  | 3.03E-04 | 3  | 4974.3164  | 4974.4711  | 0.1585  | 0.0038  |
| 4 | e | 0 | 2 | 2 | 2 | 5117.4123  | 1.25E-02 | 3  | 5117.8363  | 5117.5517  | -0.4241 | -0.1395 |
| 4 | e | 0 | 2 | 2 | 0 | 5125.0062  | 4.00E-04 | 4  | 5124.9963  | 5125.0132  | 0.0099  | -0.0070 |
| 4 | e | 2 | 3 | 1 | 1 | 5284.5686  | 1.59E-03 | 2  | 5284.8109  | 5284.5866  | -0.2423 | -0.0180 |
| 4 | e | 3 | 2 | 1 | 0 | 5606.4886  | 6.00E-04 | 1  | 5606.6976  | 5606.3668  | -0.2090 | 0.1219  |
| 4 | e | 2 | 0 | 2 | 0 | 5805.8977  | 4.02E-04 | 3  | 5805.8688  | 5805.9341  | 0.0290  | -0.0364 |
| 4 | e | 1 | 2 | 2 | 0 | 5963.3441  | 4.00E-04 | 3  | 5963.2564  | 5963.3309  | 0.0877  | 0.0133  |
| 4 | e | 0 | 0 | 3 | 0 | 6121.5613  | 6.00E-04 | 4  | 6121.5500  | 6121.5617  | 0.0113  | -0.0005 |
| 4 | e | 0 | 4 | 2 | 0 | 6158.7338  | 6.00E-04 | 3  | 6158.8778  | 6158.7437  | -0.1440 | -0.0099 |
| 4 | e | 4 | 6 | 0 | 0 | 6422.7098  | 4.50E-03 | 1  | 6425.4837  | 6422.7401  | -2.7739 | -0.0303 |
| 4 | e | 4 | 2 | 1 | 0 | 6433.0962  | 4.50E-03 | 1  | 6436.2296  | 6433.4455  | -3.1334 | -0.3493 |
| 4 | e | 3 | 4 | 1 | 0 | 6615.1292  | 4.50E-03 | 1  | 6616.1383  | 6615.1871  | -1.0091 | -0.0579 |
| 4 | e | 0 | 1 | 3 | 1 | 6619.8435  | 6.00E-04 | 1  | 6619.7592  | 6619.8523  | 0.0843  | -0.0088 |
| 4 | e | 3 | 0 | 2 | 0 | 6644.0787  | 1.00E-03 | 3  | 6644.0696  | 6644.0748  | 0.0090  | 0.0038  |
| 4 | e | 5 | 1 | 1 | 1 | 6759.5914  | 6.50E-03 | 1  | 6759.9026  | 6759.5320  | -0.3111 | 0.0594  |
| 4 | e | 4 | 3 | 1 | 1 | 6925.9228  | 8.50E-03 | 1  | 6927.7088  | 6925.9015  | -1.7860 | 0.0213  |
| 4 | e | 1 | 0 | 3 | 0 | 6970.1550  | 1.00E-01 | 2  | 6970.1713  | 6970.1299  | -0.0164 | 0.0251  |
| 4 | e | 0 | 2 | 3 | 0 | 7127.3771  | 1.00E-03 | 1  | 7127.1957  | 7127.4369  | 0.1814  | -0.0598 |
| 4 | e | 5 | 2 | 1 | 0 | 7249.7419  | 8.50E-03 | 1  | 7252.4494  | 7249.9206  | -2.7075 | -0.1787 |
| 4 | e | 1 | 2 | 3 | 0 | 7962.0364  | 4.50E-03 | 1  | 7961.9007  | 7961.9767  | 0.1357  | 0.0597  |
| 4 | e | 0 | 0 | 4 | 0 | 8114.6948  | 4.50E-03 | 1  | 8114.7192  | 8114.7045  | -0.0244 | -0.0097 |
| 4 | e | 2 | 1 | 3 | 1 | 8295.8146  | 5.50E-03 | 1  | 8295.5947  | 8295.6901  | 0.2199  | 0.1245  |
| 4 | e | 1 | 3 | 3 | 1 | 8462.3782  | 7.50E-03 | 1  | 8462.3653  | 8462.4091  | 0.0129  | -0.0309 |
| 4 | e | 1 | 0 | 4 | 0 | 8958.8407  | 1.00E-02 | 1  | 8958.7438  | 8958.7589  | 0.0968  | 0.0818  |
| 4 | e | 1 | 2 | 4 | 0 | 9937.5027  | 1.00E-02 | 1  | 9937.4182  | 9937.4889  | 0.0845  | 0.0137  |
| 4 | e | 0 | 0 | 5 | 0 | 10084.8420 | 1.00E-02 | 2  | 10084.8152 | 10084.8116 | 0.0267  | 0.0303  |
| 4 | e | 0 | 4 | 4 | 0 | 10118.0070 | 1.00E-02 | 2  | 10118.0387 | 10117.9988 | -0.0317 | 0.0082  |
| 4 | e | 0 | 1 | 5 | 1 | 10568.2283 | 1.00E-02 | 4  | 10568.2112 | 10568.2161 | 0.0170  | 0.0121  |
| 4 | e | 1 | 0 | 5 | 0 | 10923.9523 | 1.00E-02 | 1  | 10923.5150 | 10923.8510 | 0.4373  | 0.1013  |
| 4 | e | 1 | 4 | 4 | 0 | 10938.9077 | 1.00E-02 | 1  | 10938.6082 | 10938.9352 | 0.2995  | -0.0276 |
| 4 | e | 2 | 4 | 4 | 0 | 11745.0069 | 9.20E-03 | 2  | 11744.9385 | 11745.2426 | 0.0683  | -0.2358 |
| 4 | e | 2 | 0 | 5 | 0 | 11765.9045 | 1.00E-02 | 2  | 11765.8654 | 11765.8464 | 0.0391  | 0.0581  |
| 4 | e | 1 | 2 | 5 | 0 | 11890.0727 | 1.00E-02 | 1  | 11889.9105 | 11890.0626 | 0.1621  | 0.0101  |
| 4 | e | 0 | 0 | 6 | 0 | 12031.8360 | 1.02E-02 | 2  | 12031.6780 | 12031.8363 | 0.1579  | -0.0003 |
| 4 | e | 1 | 1 | 6 | 1 | 13336.1514 | 5.00E-03 | 1  | 13336.0987 | 13336.1592 | 0.0527  | -0.0079 |
| 4 | e | 0 | 0 | 7 | 0 | 13955.7077 | 2.25E-02 | 1  | 13955.1823 | 13955.7153 | 0.5254  | -0.0076 |
| 4 | f | 0 | 1 | 0 | 1 | 524.4884   | 2.13E-06 | 29 | 524.4917   | 524.4889   | -0.0032 | -0.0005 |
| 4 | f | 0 | 2 | 0 | 2 | 1045.3608  | 1.25E-02 | 9  | 1045.4277  | 1045.3626  | -0.0670 | -0.0018 |
| 4 | f | 1 | 1 | 0 | 1 | 1376.5146  | 6.67E-04 | 8  | 1376.5199  | 1376.5184  | -0.0053 | -0.0038 |
| 4 | f | 0 | 3 | 0 | 1 | 1577.4459  | 2.48E-06 | 5  | 1577.4345  | 1577.4440  | 0.0113  | 0.0019  |
| 4 | f | 1 | 2 | 0 | 2 | 1891.0056  | 1.30E-02 | 5  | 1891.0857  | 1890.9976  | -0.0802 | 0.0080  |
| 4 | f | 0 | 4 | 0 | 2 | 2103.6034  | 1.25E-02 | 4  | 2103.6106  | 2103.6117  | -0.0071 | -0.0083 |
| 4 | f | 2 | 1 | 0 | 1 | 2222.0733  | 3.90E-03 | 2  | 2222.0991  | 2222.0685  | -0.0258 | 0.0048  |
| 4 | f | 1 | 3 | 0 | 1 | 2416.1920  | 2.00E-04 | 5  | 2416.1715  | 2416.1949  | 0.0205  | -0.0030 |
| 4 | f | 0 | 1 | 1 | 1 | 2579.3498  | 6.08E-03 | 3  | 2579.3814  | 2579.3468  | -0.0315 | 0.0030  |
| 4 | f | 0 | 5 | 0 | 1 | 2639.6811  | 5.00E-03 | 3  | 2639.6883  | 2639.6518  | -0.0072 | 0.0293  |

|   |   |   |   |   |   |            |          |     |            |            |         |         |
|---|---|---|---|---|---|------------|----------|-----|------------|------------|---------|---------|
| 4 | f | 2 | 3 | 1 | 1 | 5284.5732  | 2.71E-03 | 2   | 5284.8203  | 5284.5962  | -0.2472 | -0.0231 |
| 4 | f | 1 | 3 | 2 | 1 | 6470.1722  | 6.00E-04 | 1   | 6470.2281  | 6470.1929  | -0.0559 | -0.0207 |
| 4 | f | 5 | 1 | 1 | 1 | 6759.5978  | 5.50E-03 | 1   | 6759.9084  | 6759.5380  | -0.3106 | 0.0598  |
| 4 | f | 2 | 1 | 3 | 1 | 8295.8209  | 5.50E-03 | 1   | 8295.6009  | 8295.6971  | 0.2200  | 0.1239  |
| 4 | f | 1 | 1 | 6 | 1 | 13336.1539 | 5.00E-03 | 1   | 13335.8777 | 13336.1661 | 0.2762  | -0.0122 |
| 5 | e | 0 | 0 | 0 | 0 | 6.0857     | 2.36E-07 | 130 | 6.0695     | 6.0852     | 0.0162  | 0.0005  |
| 5 | e | 0 | 1 | 0 | 1 | 526.5152   | 1.60E-06 | 39  | 526.5132   | 526.5155   | 0.0020  | -0.0003 |
| 5 | e | 1 | 0 | 0 | 0 | 865.0344   | 4.34E-05 | 17  | 865.0697   | 865.0281   | -0.0352 | 0.0064  |
| 5 | e | 0 | 2 | 0 | 2 | 1047.3963  | 1.14E-02 | 6   | 1047.4580  | 1047.3979  | -0.0617 | -0.0015 |
| 5 | e | 0 | 2 | 0 | 0 | 1053.1464  | 1.01E-06 | 19  | 1053.2128  | 1053.1461  | -0.0664 | 0.0004  |
| 5 | e | 1 | 1 | 0 | 1 | 1378.5355  | 1.30E-04 | 7   | 1378.5349  | 1378.5390  | 0.0006  | -0.0035 |
| 5 | e | 0 | 3 | 0 | 1 | 1579.4732  | 2.48E-06 | 5   | 1579.4564  | 1579.4708  | 0.0167  | 0.0023  |
| 5 | e | 2 | 0 | 0 | 0 | 1717.0253  | 1.23E-04 | 4   | 1717.0485  | 1717.0274  | -0.0232 | -0.0021 |
| 5 | e | 1 | 2 | 0 | 2 | 1893.0360  | 1.45E-02 | 3   | 1893.1102  | 1893.0276  | -0.0742 | 0.0084  |
| 5 | e | 1 | 2 | 0 | 0 | 1898.3192  | 1.34E-04 | 4   | 1898.2391  | 1898.3328  | 0.0802  | -0.0136 |
| 5 | e | 0 | 0 | 1 | 0 | 2068.2501  | 8.98E-07 | 8   | 2068.2711  | 2068.2488  | -0.0210 | 0.0013  |
| 5 | e | 0 | 4 | 0 | 2 | 2105.6439  | 1.14E-02 | 6   | 2105.6455  | 2105.6518  | -0.0016 | -0.0079 |
| 5 | e | 0 | 4 | 0 | 0 | 2110.9465  | 8.00E-04 | 5   | 2110.8209  | 2110.9715  | 0.1256  | -0.0250 |
| 5 | e | 2 | 1 | 0 | 1 | 2224.0881  | 5.52E-03 | 1   | 2224.1075  | 2224.0830  | -0.0194 | 0.0051  |
| 5 | e | 1 | 3 | 0 | 1 | 2418.2136  | 2.00E-04 | 6   | 2418.1872  | 2418.2162  | 0.0264  | -0.0026 |
| 5 | e | 3 | 0 | 0 | 0 | 2562.0216  | 4.00E-03 | 4   | 2561.9318  | 2562.0334  | 0.0897  | -0.0118 |
| 5 | e | 0 | 1 | 1 | 1 | 2581.3652  | 4.30E-03 | 4   | 2581.3908  | 2581.3615  | -0.0256 | 0.0037  |
| 5 | e | 0 | 5 | 0 | 1 | 2641.7128  | 5.00E-03 | 3   | 2641.7097  | 2641.6782  | 0.0031  | 0.0346  |
| 5 | e | 2 | 2 | 0 | 0 | 2737.4715  | 3.53E-03 | 3   | 2737.3747  | 2737.4786  | 0.0968  | -0.0071 |
| 5 | e | 1 | 0 | 1 | 0 | 2924.1403  | 5.66E-03 | 2   | 2924.1709  | 2924.1579  | -0.0306 | -0.0176 |
| 5 | e | 1 | 4 | 0 | 2 | 2938.3214  | 1.14E-02 | 1   | 2938.4845  | 2938.2732  | -0.1631 | 0.0482  |
| 5 | e | 1 | 4 | 0 | 0 | 2943.2499  | 4.00E-03 | 1   | 2943.1530  | 2943.2021  | 0.0969  | 0.0478  |
| 5 | e | 0 | 2 | 1 | 0 | 3101.6236  | 4.00E-03 | 2   | 3101.7182  | 3101.6051  | -0.0945 | 0.0186  |
| 5 | e | 2 | 0 | 1 | 0 | 3774.5485  | 1.00E-01 | 2   | 3774.5927  | 3774.5132  | -0.0441 | 0.0353  |
| 5 | e | 1 | 2 | 1 | 0 | 3943.4824  | 3.00E-04 | 3   | 3943.4067  | 3943.4749  | 0.0757  | 0.0075  |
| 5 | e | 1 | 6 | 0 | 0 | 3996.2231  | 3.00E-04 | 1   | 3997.4756  | 3996.2290  | -1.2525 | -0.0059 |
| 5 | e | 0 | 0 | 2 | 0 | 4107.3995  | 3.00E-04 | 5   | 4107.3979  | 4107.4014  | 0.0016  | -0.0019 |
| 5 | e | 0 | 4 | 1 | 0 | 4147.3605  | 2.61E-02 | 2   | 4147.3685  | 4147.3021  | -0.0080 | 0.0584  |
| 5 | e | 1 | 3 | 1 | 1 | 4456.8177  | 3.00E-04 | 2   | 4456.8651  | 4456.8217  | -0.0475 | -0.0040 |
| 5 | e | 0 | 5 | 1 | 1 | 4672.1759  | 3.00E-04 | 1   | 4672.3476  | 4672.1785  | -0.1717 | -0.0026 |
| 5 | e | 2 | 2 | 1 | 0 | 4779.2597  | 3.03E-04 | 3   | 4779.2487  | 4779.2341  | 0.0110  | 0.0256  |
| 5 | e | 1 | 0 | 2 | 0 | 4959.8796  | 3.03E-04 | 5   | 4959.8996  | 4959.8921  | -0.0200 | -0.0125 |
| 5 | e | 1 | 4 | 1 | 0 | 4976.4969  | 3.03E-04 | 2   | 4976.3326  | 4976.4933  | 0.1643  | 0.0036  |
| 5 | e | 0 | 2 | 2 | 0 | 5127.0176  | 4.00E-04 | 5   | 5127.0016  | 5127.0245  | 0.0161  | -0.0068 |
| 5 | e | 0 | 6 | 1 | 0 | 5202.1117  | 3.00E-04 | 2   | 5202.5116  | 5202.2555  | -0.3999 | -0.1439 |
| 5 | e | 2 | 3 | 1 | 1 | 5286.5891  | 1.13E-03 | 2   | 5286.8183  | 5286.6008  | -0.2293 | -0.0118 |
| 5 | e | 4 | 0 | 1 | 0 | 5450.9374  | 4.00E-04 | 2   | 5450.7752  | 5450.9349  | 0.1622  | 0.0025  |
| 5 | e | 1 | 1 | 2 | 1 | 5458.4705  | 4.00E-04 | 1   | 5458.1297  | 5458.4602  | 0.3408  | 0.0103  |
| 5 | e | 3 | 2 | 1 | 0 | 5608.4999  | 6.00E-04 | 1   | 5608.7005  | 5608.3770  | -0.2006 | 0.1229  |
| 5 | e | 0 | 3 | 2 | 1 | 5640.2705  | 3.00E-04 | 1   | 5640.6315  | 5640.2682  | -0.3610 | 0.0023  |
| 5 | e | 2 | 4 | 1 | 0 | 5798.0474  | 6.00E-04 | 2   | 5798.2462  | 5798.0342  | -0.1988 | 0.0132  |
| 5 | e | 2 | 0 | 2 | 0 | 5807.8931  | 4.02E-04 | 4   | 5807.8584  | 5807.9295  | 0.0347  | -0.0364 |
| 5 | e | 1 | 2 | 2 | 0 | 5965.3515  | 4.00E-04 | 4   | 5965.2566  | 5965.3378  | 0.0949  | 0.0137  |
| 5 | e | 0 | 0 | 3 | 0 | 6123.5537  | 4.02E-04 | 5   | 6123.5375  | 6123.5543  | 0.0162  | -0.0006 |
| 5 | e | 0 | 4 | 2 | 0 | 6160.7505  | 6.00E-04 | 4   | 6160.8879  | 6160.7602  | -0.1374 | -0.0097 |
| 5 | e | 5 | 0 | 1 | 0 | 6279.0751  | 4.50E-03 | 1   | 6278.7916  | 6279.0105  | 0.2835  | 0.0646  |
| 5 | e | 2 | 1 | 2 | 1 | 6296.9125  | 6.00E-04 | 1   | 6296.5854  | 6296.8235  | 0.3272  | 0.0891  |
| 5 | e | 1 | 3 | 2 | 1 | 6472.1720  | 6.00E-04 | 2   | 6472.2203  | 6472.1917  | -0.0483 | -0.0197 |
| 5 | e | 0 | 1 | 3 | 1 | 6621.8403  | 6.00E-04 | 1   | 6621.7490  | 6621.8476  | 0.0912  | -0.0073 |
| 5 | e | 3 | 0 | 2 | 0 | 6646.0655  | 1.00E-03 | 3   | 6646.0502  | 6646.0620  | 0.0153  | 0.0035  |
| 5 | e | 2 | 2 | 2 | 0 | 6797.5495  | 1.00E-03 | 1   | 6797.7158  | 6797.4976  | -0.1662 | 0.0519  |
| 5 | e | 1 | 0 | 3 | 0 | 6972.1446  | 1.00E-03 | 4   | 6972.1553  | 6972.1201  | -0.0107 | 0.0245  |

|   |   |   |   |   |   |            |          |     |            |            |         |         |
|---|---|---|---|---|---|------------|----------|-----|------------|------------|---------|---------|
| 5 | e | 0 | 2 | 3 | 0 | 7129.3772  | 6.00E-04 | 2   | 7129.1891  | 7129.4366  | 0.1881  | -0.0594 |
| 5 | e | 3 | 1 | 2 | 1 | 7132.8738  | 5.50E-03 | 1   | 7133.2985  | 7133.2243  | -0.4247 | -0.3506 |
| 5 | e | 4 | 0 | 2 | 0 | 7478.1260  | 4.50E-03 | 1   | 7478.7807  | 7478.0491  | -0.6546 | 0.0769  |
| 5 | e | 2 | 0 | 3 | 0 | 7817.9034  | 4.50E-03 | 1   | 7817.8473  | 7817.9439  | 0.0561  | -0.0405 |
| 5 | e | 1 | 2 | 3 | 0 | 7964.0370  | 4.50E-03 | 1   | 7963.8896  | 7963.9727  | 0.1475  | 0.0644  |
| 5 | e | 1 | 2 | 4 | 0 | 9939.4809  | 1.00E-02 | 1   | 9939.3960  | 9939.4740  | 0.0849  | 0.0069  |
| 5 | e | 0 | 0 | 5 | 0 | 10086.8115 | 1.00E-02 | 2   | 10086.7805 | 10086.7813 | 0.0310  | 0.0302  |
| 5 | e | 0 | 4 | 4 | 0 | 10119.9975 | 1.00E-02 | 2   | 10120.0244 | 10119.9929 | -0.0269 | 0.0046  |
| 5 | e | 0 | 1 | 5 | 1 | 10570.2043 | 1.00E-02 | 4   | 10570.1778 | 10570.1880 | 0.0265  | 0.0163  |
| 5 | e | 1 | 0 | 5 | 0 | 10925.9237 | 1.00E-02 | 2   | 10925.4831 | 10925.8246 | 0.4405  | 0.0990  |
| 5 | e | 1 | 4 | 4 | 0 | 10940.8885 | 1.00E-02 | 2   | 10940.5821 | 10940.9160 | 0.3064  | -0.0275 |
| 5 | e | 2 | 4 | 4 | 0 | 11747.0061 | 5.00E-03 | 1   | 11746.9180 | 11747.2290 | 0.0881  | -0.2228 |
| 5 | e | 2 | 0 | 5 | 0 | 11767.8610 | 1.00E-02 | 2   | 11767.8197 | 11767.8066 | 0.0413  | 0.0544  |
| 5 | e | 1 | 2 | 5 | 0 | 11892.0409 | 1.00E-02 | 1   | 11891.8778 | 11892.0690 | 0.1631  | -0.0281 |
| 5 | e | 0 | 0 | 6 | 0 | 12033.8015 | 1.00E-02 | 2   | 12033.6333 | 12033.7949 | 0.1682  | 0.0066  |
| 5 | e | 1 | 3 | 5 | 1 | 12380.0854 | 1.18E-02 | 1   | 12379.3812 | 12379.9710 | 0.7042  | 0.1144  |
| 5 | e | 2 | 2 | 5 | 0 | 12712.8716 | 1.00E-02 | 2   | 12713.5604 | 12712.7972 | -0.6889 | 0.0744  |
| 5 | e | 1 | 0 | 6 | 0 | 12867.9362 | 1.35E-02 | 1   | 12866.7916 | 12867.8604 | 1.1446  | 0.0758  |
| 5 | e | 1 | 4 | 5 | 0 | 12884.6111 | 1.35E-02 | 1   | 12884.2925 | 12884.5133 | 0.3186  | 0.0978  |
| 5 | e | 0 | 2 | 6 | 0 | 12999.4107 | 1.26E-02 | 2   | 12998.1693 | 12999.5028 | 1.2414  | -0.0922 |
| 5 | e | 1 | 1 | 6 | 1 | 13338.1062 | 5.00E-03 | 3   | 13338.0559 | 13338.1184 | 0.0503  | -0.0122 |
| 5 | e | 0 | 0 | 7 | 0 | 13957.6744 | 1.00E-02 | 2   | 13957.1312 | 13957.6640 | 0.5432  | 0.0104  |
| 5 | f | 0 | 1 | 0 | 1 | 526.5216   | 1.61E-06 | 25  | 526.5195   | 526.5219   | 0.0021  | -0.0003 |
| 5 | f | 0 | 2 | 0 | 2 | 1047.3963  | 1.14E-02 | 5   | 1047.4580  | 1047.3979  | -0.0617 | -0.0015 |
| 5 | f | 1 | 1 | 0 | 1 | 1378.5423  | 6.67E-04 | 6   | 1378.5417  | 1378.5458  | 0.0006  | -0.0035 |
| 5 | f | 0 | 3 | 0 | 1 | 1579.4855  | 2.49E-06 | 5   | 1579.4687  | 1579.4833  | 0.0168  | 0.0023  |
| 5 | f | 1 | 2 | 0 | 2 | 1893.0360  | 1.45E-02 | 3   | 1893.1103  | 1893.0277  | -0.0742 | 0.0084  |
| 5 | f | 0 | 4 | 0 | 2 | 2105.6439  | 1.14E-02 | 6   | 2105.6456  | 2105.6518  | -0.0016 | -0.0079 |
| 5 | f | 2 | 1 | 0 | 1 | 2224.0954  | 5.52E-03 | 1   | 2224.1148  | 2224.0903  | -0.0194 | 0.0051  |
| 5 | f | 1 | 3 | 0 | 1 | 2418.2267  | 2.00E-04 | 7   | 2418.2002  | 2418.2293  | 0.0265  | -0.0026 |
| 5 | f | 0 | 1 | 1 | 1 | 2581.3710  | 4.30E-03 | 4   | 2581.3971  | 2581.3680  | -0.0261 | 0.0031  |
| 5 | f | 0 | 5 | 0 | 1 | 2641.7200  | 5.00E-03 | 4   | 2641.7278  | 2641.6964  | -0.0078 | 0.0236  |
| 5 | f | 1 | 4 | 0 | 2 | 2938.3214  | 1.14E-02 | 1   | 2938.4845  | 2938.2732  | -0.1631 | 0.0482  |
| 5 | f | 0 | 1 | 2 | 1 | 4613.1369  | 8.70E-03 | 1   | 4613.1022  | 4613.1390  | 0.0347  | -0.0021 |
| 5 | f | 2 | 3 | 1 | 1 | 5286.5962  | 8.20E-04 | 2   | 5286.8325  | 5286.6153  | -0.2362 | -0.0190 |
| 5 | f | 3 | 1 | 2 | 1 | 7132.8829  | 5.50E-03 | 1   | 7133.3098  | 7133.2349  | -0.4269 | -0.3520 |
| 5 | f | 1 | 3 | 5 | 1 | 12380.0943 | 1.18E-02 | 1   | 12379.3959 | 12379.9868 | 0.6984  | 0.1075  |
| 5 | f | 1 | 1 | 6 | 1 | 13338.1113 | 5.00E-03 | 3   | 13338.0682 | 13338.1287 | 0.0431  | -0.0174 |
| 6 | e | 0 | 0 | 0 | 0 | 8.5199     | 3.19E-07 | 116 | 8.4973     | 8.5192     | 0.0226  | 0.0007  |
| 6 | e | 0 | 1 | 0 | 1 | 528.9524   | 1.61E-06 | 43  | 528.9440   | 528.9525   | 0.0084  | -0.0001 |
| 6 | e | 1 | 0 | 0 | 0 | 867.4614   | 4.34E-05 | 16  | 867.4896   | 867.4548   | -0.0282 | 0.0066  |
| 6 | e | 0 | 2 | 0 | 2 | 1049.8413  | 1.02E-02 | 8   | 1049.8943  | 1049.8402  | -0.0530 | 0.0012  |
| 6 | e | 0 | 2 | 0 | 0 | 1055.5882  | 1.04E-06 | 22  | 1055.6480  | 1055.5873  | -0.0598 | 0.0008  |
| 6 | e | 1 | 1 | 0 | 1 | 1380.9660  | 1.30E-04 | 4   | 1380.9583  | 1380.9692  | 0.0077  | -0.0032 |
| 6 | e | 0 | 3 | 0 | 1 | 1581.9158  | 2.47E-06 | 7   | 1581.8925  | 1581.9130  | 0.0233  | 0.0028  |
| 6 | e | 2 | 0 | 0 | 0 | 1719.4449  | 1.23E-04 | 6   | 1719.4606  | 1719.4467  | -0.0156 | -0.0018 |
| 6 | e | 1 | 2 | 0 | 2 | 1895.4726  | 1.58E-02 | 1   | 1895.5396  | 1895.4637  | -0.0671 | 0.0089  |
| 6 | e | 1 | 2 | 0 | 0 | 1900.7546  | 1.34E-04 | 2   | 1900.6673  | 1900.7677  | 0.0873  | -0.0131 |
| 6 | e | 0 | 0 | 1 | 0 | 2070.6698  | 6.39E-07 | 8   | 2070.6845  | 2070.6685  | -0.0147 | 0.0013  |
| 6 | e | 0 | 4 | 0 | 2 | 2108.0925  | 1.25E-02 | 1   | 2108.0875  | 2108.0999  | 0.0050  | -0.0074 |
| 6 | e | 0 | 4 | 0 | 0 | 2113.3946  | 8.00E-04 | 3   | 2113.2619  | 2113.4186  | 0.1327  | -0.0240 |
| 6 | e | 2 | 1 | 0 | 1 | 2226.5120  | 3.90E-03 | 2   | 2226.5234  | 2226.5062  | -0.0114 | 0.0059  |
| 6 | e | 1 | 3 | 0 | 1 | 2420.6500  | 2.00E-04 | 3   | 2420.6164  | 2420.6521  | 0.0336  | -0.0021 |
| 6 | e | 3 | 0 | 0 | 0 | 2564.4338  | 4.00E-03 | 3   | 2564.3359  | 2564.4451  | 0.0979  | -0.0113 |
| 6 | e | 0 | 1 | 1 | 1 | 2583.7881  | 4.30E-03 | 2   | 2583.8071  | 2583.7843  | -0.0191 | 0.0038  |
| 6 | e | 0 | 5 | 0 | 1 | 2644.1595  | 7.07E-03 | 1   | 2644.1498  | 2644.1244  | 0.0097  | 0.0351  |
| 6 | e | 2 | 2 | 0 | 0 | 2739.9005  | 4.00E-03 | 2   | 2739.7960  | 2739.9070  | 0.1045  | -0.0065 |



|   |   |   |   |   |   |            |          |    |            |            |         |         |
|---|---|---|---|---|---|------------|----------|----|------------|------------|---------|---------|
| 6 | e | 1 | 0 | 1 | 0 | 2926.5535  | 4.00E-03 | 4  | 2926.5769  | 2926.5709  | -0.0234 | -0.0175 |
| 6 | e | 0 | 2 | 1 | 0 | 3104.0513  | 4.00E-03 | 3  | 3104.1388  | 3104.0325  | -0.0875 | 0.0189  |
| 6 | e | 2 | 0 | 1 | 0 | 3776.9330  | 3.55E-03 | 2  | 3776.9963  | 3776.9231  | -0.0634 | 0.0099  |
| 6 | e | 1 | 2 | 1 | 0 | 3945.9044  | 3.00E-04 | 4  | 3945.8208  | 3945.8965  | 0.0836  | 0.0079  |
| 6 | e | 0 | 0 | 2 | 0 | 4109.8047  | 3.00E-04 | 5  | 4109.7969  | 4109.8066  | 0.0077  | -0.0019 |
| 6 | e | 0 | 4 | 1 | 0 | 4149.7309  | 3.00E-04 | 2  | 4149.7951  | 4149.7356  | -0.0642 | -0.0048 |
| 6 | e | 1 | 3 | 1 | 1 | 4459.2409  | 3.00E-04 | 1  | 4459.2803  | 4459.2445  | -0.0394 | -0.0036 |
| 6 | e | 0 | 5 | 1 | 1 | 4674.6093  | 3.00E-04 | 1  | 4674.7735  | 4674.6114  | -0.1642 | -0.0021 |
| 6 | e | 2 | 2 | 1 | 0 | 4781.6763  | 3.03E-04 | 3  | 4781.6565  | 4781.6500  | 0.0197  | 0.0262  |
| 6 | e | 1 | 0 | 2 | 0 | 4962.2797  | 4.00E-04 | 4  | 4962.2923  | 4962.2922  | -0.0126 | -0.0124 |
| 6 | e | 1 | 4 | 1 | 0 | 4978.9240  | 3.03E-04 | 2  | 4978.7520  | 4978.9199  | 0.1720  | 0.0042  |
| 6 | e | 0 | 2 | 2 | 2 | 5121.8412  | 1.02E-02 | 1  | 5122.2498  | 5121.9780  | -0.4086 | -0.1368 |
| 6 | e | 0 | 2 | 2 | 0 | 5129.4314  | 4.00E-04 | 4  | 5129.4078  | 5129.4380  | 0.0236  | -0.0066 |
| 6 | e | 0 | 6 | 1 | 0 | 5204.5516  | 4.00E-04 | 1  | 5204.9434  | 5204.6945  | -0.3918 | -0.1428 |
| 6 | e | 2 | 3 | 1 | 1 | 5289.0025  | 8.13E-04 | 2  | 5289.2272  | 5289.0179  | -0.2248 | -0.0154 |
| 6 | e | 4 | 0 | 1 | 0 | 5453.3283  | 4.00E-04 | 1  | 5453.1574  | 5453.3254  | 0.1708  | 0.0029  |
| 6 | e | 1 | 1 | 2 | 1 | 5460.8757  | 3.52E-04 | 1  | 5460.5250  | 5460.8632  | 0.3508  | 0.0125  |
| 6 | e | 3 | 2 | 1 | 0 | 5610.9119  | 6.00E-04 | 1  | 5611.1040  | 5610.7893  | -0.1921 | 0.1226  |
| 6 | e | 0 | 3 | 2 | 1 | 5642.6887  | 4.00E-04 | 1  | 5643.0388  | 5642.6831  | -0.3501 | 0.0056  |
| 6 | e | 2 | 4 | 1 | 0 | 5800.4680  | 6.00E-04 | 2  | 5800.6573  | 5800.4541  | -0.1893 | 0.0139  |
| 6 | e | 2 | 0 | 2 | 0 | 5810.2878  | 4.02E-04 | 4  | 5810.2461  | 5810.3241  | 0.0417  | -0.0363 |
| 6 | e | 1 | 2 | 2 | 2 | 5960.7003  | 1.02E-02 | 1  | 5960.7186  | 5960.8071  | -0.0183 | -0.1068 |
| 6 | e | 1 | 2 | 2 | 0 | 5967.7595  | 6.00E-04 | 4  | 5967.6568  | 5967.7461  | 0.1027  | 0.0134  |
| 6 | e | 0 | 0 | 3 | 0 | 6125.9446  | 6.00E-04 | 4  | 6125.9225  | 6125.9453  | 0.0221  | -0.0007 |
| 6 | e | 0 | 4 | 2 | 0 | 6163.1706  | 6.00E-04 | 3  | 6163.3000  | 6163.1800  | -0.1293 | -0.0093 |
| 6 | e | 2 | 1 | 2 | 1 | 6299.3118  | 4.21E-04 | 2  | 6298.9752  | 6299.2225  | 0.3366  | 0.0893  |
| 6 | e | 3 | 4 | 1 | 0 | 6619.5605  | 4.50E-03 | 1  | 6620.5546  | 6619.6192  | -0.9941 | -0.0587 |
| 6 | e | 0 | 1 | 3 | 1 | 6624.2354  | 6.00E-04 | 1  | 6624.1368  | 6624.2420  | 0.0986  | -0.0066 |
| 6 | e | 3 | 0 | 2 | 0 | 6648.4516  | 1.00E-03 | 2  | 6648.4268  | 6648.4465  | 0.0248  | 0.0050  |
| 6 | e | 5 | 1 | 1 | 1 | 6763.9705  | 6.50E-03 | 1  | 6764.2653  | 6763.9109  | -0.2947 | 0.0597  |
| 6 | e | 2 | 2 | 2 | 0 | 6799.9530  | 1.00E-03 | 1  | 6800.1105  | 6799.9012  | -0.1575 | 0.0518  |
| 6 | e | 1 | 0 | 3 | 0 | 6974.5326  | 1.00E-03 | 4  | 6974.5360  | 6974.5083  | -0.0034 | 0.0242  |
| 6 | e | 6 | 0 | 1 | 0 | 7102.5402  | 6.50E-03 | 1  | 7102.1411  | 7102.3741  | 0.3990  | 0.1661  |
| 6 | e | 0 | 2 | 3 | 0 | 7131.7771  | 1.00E-03 | 2  | 7131.5812  | 7131.8363  | 0.1959  | -0.0592 |
| 6 | e | 5 | 2 | 1 | 0 | 7254.1391  | 6.50E-03 | 1  | 7256.8257  | 7254.3119  | -2.6866 | -0.1728 |
| 6 | e | 4 | 0 | 2 | 0 | 7480.5019  | 4.50E-03 | 1  | 7480.5877  | 7480.4261  | -0.0859 | 0.0758  |
| 6 | e | 1 | 2 | 3 | 0 | 7966.4365  | 4.50E-03 | 1  | 7966.2762  | 7966.3679  | 0.1603  | 0.0686  |
| 6 | e | 0 | 0 | 4 | 0 | 8119.0542  | 4.50E-03 | 1  | 8119.0666  | 8119.0623  | -0.0124 | -0.0081 |
| 6 | e | 1 | 0 | 4 | 0 | 8963.1913  | 1.00E-02 | 2  | 8963.0899  | 8963.1184  | 0.1014  | 0.0728  |
| 6 | e | 0 | 0 | 5 | 0 | 10089.1743 | 1.00E-02 | 2  | 10089.1388 | 10089.1448 | 0.0355  | 0.0295  |
| 6 | e | 0 | 4 | 4 | 0 | 10122.3923 | 1.00E-02 | 2  | 10122.4072 | 10122.3859 | -0.0149 | 0.0064  |
| 6 | e | 0 | 1 | 5 | 1 | 10572.5678 | 1.00E-02 | 2  | 10572.5377 | 10572.5541 | 0.0301  | 0.0137  |
| 6 | e | 1 | 0 | 5 | 0 | 10928.3034 | 1.00E-02 | 2  | 10927.8449 | 10928.1930 | 0.4585  | 0.1104  |
| 6 | e | 1 | 4 | 4 | 0 | 10943.2714 | 1.00E-02 | 3  | 10942.9509 | 10943.2929 | 0.3205  | -0.0215 |
| 6 | e | 0 | 2 | 5 | 0 | 11067.7200 | 1.00E-02 | 2  | 11067.0142 | 11067.8518 | 0.7058  | -0.1318 |
| 6 | e | 2 | 4 | 4 | 0 | 11749.3821 | 8.50E-03 | 3  | 11749.2933 | 11749.6126 | 0.0887  | -0.2305 |
| 6 | e | 2 | 0 | 5 | 0 | 11770.2157 | 1.00E-02 | 3  | 11770.1649 | 11770.1589 | 0.0508  | 0.0569  |
| 6 | e | 1 | 2 | 5 | 0 | 11894.4102 | 1.00E-02 | 2  | 11894.2384 | 11894.4932 | 0.1717  | -0.0830 |
| 6 | e | 0 | 0 | 6 | 0 | 12036.1548 | 8.50E-03 | 1  | 12035.9796 | 12036.1453 | 0.1752  | 0.0095  |
| 6 | e | 1 | 3 | 5 | 1 | 12382.4497 | 8.40E-03 | 2  | 12381.7435 | 12382.3417 | 0.7062  | 0.1080  |
| 6 | e | 0 | 1 | 6 | 1 | 12512.3153 | 8.50E-03 | 1  | 12512.3453 | 12512.2319 | -0.0300 | 0.0834  |
| 6 | e | 2 | 2 | 5 | 0 | 12715.2487 | 1.00E-02 | 2  | 12715.9188 | 12715.1631 | -0.6701 | 0.0856  |
| 6 | e | 1 | 1 | 6 | 1 | 13340.4708 | 5.90E-03 | 1  | 13340.4050 | 13340.4694 | 0.0658  | 0.0014  |
| 6 | e | 0 | 0 | 7 | 0 | 13960.0438 | 2.27E-02 | 1  | 13959.4703 | 13960.0024 | 0.5735  | 0.0415  |
| 6 | f | 0 | 1 | 0 | 1 | 528.9613   | 1.63E-06 | 29 | 528.9529   | 528.9614   | 0.0084  | -0.0001 |
| 6 | f | 0 | 2 | 0 | 2 | 1049.8414  | 1.02E-02 | 8  | 1049.8943  | 1049.8402  | -0.0530 | 0.0012  |
| 6 | f | 1 | 1 | 0 | 1 | 1380.9755  | 6.67E-04 | 3  | 1380.9678  | 1380.9787  | 0.0077  | -0.0032 |

|   |   |   |   |   |   |            |          |     |            |            |         |         |
|---|---|---|---|---|---|------------|----------|-----|------------|------------|---------|---------|
| 6 | f | 0 | 3 | 0 | 1 | 1581.9331  | 2.48E-06 | 5   | 1581.9097  | 1581.9304  | 0.0234  | 0.0027  |
| 6 | f | 1 | 2 | 0 | 2 | 1895.4726  | 1.58E-02 | 1   | 1895.5397  | 1895.4637  | -0.0671 | 0.0088  |
| 6 | f | 0 | 4 | 0 | 2 | 2108.0955  | 1.25E-02 | 1   | 2108.0876  | 2108.0999  | 0.0080  | -0.0044 |
| 6 | f | 2 | 1 | 0 | 1 | 2226.5223  | 3.90E-03 | 2   | 2226.5336  | 2226.5164  | -0.0113 | 0.0059  |
| 6 | f | 1 | 3 | 0 | 1 | 2420.6684  | 2.00E-04 | 3   | 2420.6347  | 2420.6705  | 0.0338  | -0.0021 |
| 6 | f | 0 | 1 | 1 | 1 | 2583.7965  | 4.30E-03 | 2   | 2583.8160  | 2583.7933  | -0.0196 | 0.0031  |
| 6 | f | 0 | 5 | 0 | 1 | 2644.1740  | 7.07E-03 | 1   | 2644.1752  | 2644.1499  | -0.0012 | 0.0241  |
| 6 | f | 2 | 3 | 1 | 1 | 5289.0154  | 4.00E-04 | 2   | 5289.2470  | 5289.0381  | -0.2316 | -0.0227 |
| 6 | f | 1 | 1 | 2 | 1 | 5460.8839  | 4.00E-04 | 1   | 5460.5349  | 5460.8737  | 0.3490  | 0.0102  |
| 6 | f | 2 | 1 | 2 | 1 | 6299.3247  | 6.00E-04 | 1   | 6298.9871  | 6299.2354  | 0.3376  | 0.0893  |
| 6 | f | 4 | 3 | 1 | 1 | 6930.3647  | 4.50E-03 | 1   | 6932.1311  | 6930.3440  | -1.7664 | 0.0207  |
| 6 | f | 1 | 3 | 3 | 1 | 8466.7897  | 5.50E-03 | 1   | 8466.7623  | 8466.8230  | 0.0274  | -0.0332 |
| 6 | f | 1 | 3 | 5 | 1 | 12382.4595 | 8.40E-03 | 2   | 12381.7641 | 12382.3636 | 0.6955  | 0.0959  |
| 6 | f | 0 | 1 | 6 | 1 | 12512.3272 | 8.50E-03 | 1   | 12512.3552 | 12512.2430 | -0.0280 | 0.0842  |
| 6 | f | 1 | 1 | 6 | 1 | 13340.4827 | 5.90E-03 | 1   | 13340.4224 | 13340.4837 | 0.0603  | -0.0011 |
| 7 | e | 0 | 0 | 0 | 0 | 11.3598    | 3.85E-07 | 121 | 11.3297    | 11.3589    | 0.0302  | 0.0009  |
| 7 | e | 0 | 1 | 0 | 1 | 531.7958   | 1.63E-06 | 45  | 531.7800   | 531.7956   | 0.0158  | 0.0002  |
| 7 | e | 1 | 0 | 0 | 0 | 870.2929   | 4.34E-05 | 11  | 870.3129   | 870.2860   | -0.0200 | 0.0069  |
| 7 | e | 0 | 2 | 0 | 2 | 1052.6911  | 8.77E-03 | 6   | 1052.7366  | 1052.6896  | -0.0455 | 0.0016  |
| 7 | e | 0 | 2 | 0 | 0 | 1058.4368  | 1.07E-06 | 18  | 1058.4890  | 1058.4355  | -0.0521 | 0.0013  |
| 7 | e | 1 | 1 | 0 | 1 | 1383.8016  | 1.30E-04 | 4   | 1383.7856  | 1383.8043  | 0.0160  | -0.0027 |
| 7 | e | 0 | 3 | 0 | 1 | 1584.7655  | 2.48E-06 | 5   | 1584.7345  | 1584.7622  | 0.0310  | 0.0033  |
| 7 | e | 2 | 0 | 0 | 0 | 1722.2677  | 1.20E-04 | 7   | 1722.2746  | 1722.2693  | -0.0069 | -0.0016 |
| 7 | e | 1 | 2 | 0 | 0 | 1903.5895  | 2.50E-02 | 1   | 1903.5002  | 1903.6084  | 0.0893  | -0.0189 |
| 7 | e | 0 | 0 | 1 | 0 | 2073.4927  | 9.11E-07 | 5   | 2073.5000  | 2073.4914  | -0.0074 | 0.0013  |
| 7 | e | 0 | 4 | 0 | 2 | 2110.9499  | 1.14E-02 | 1   | 2110.9365  | 2110.9560  | 0.0135  | -0.0060 |
| 7 | e | 0 | 4 | 0 | 0 | 2116.2498  | 9.00E-05 | 4   | 2116.1098  | 2116.2735  | 0.1400  | -0.0237 |
| 7 | e | 2 | 1 | 0 | 1 | 2229.3397  | 3.90E-03 | 2   | 2229.3420  | 2229.3332  | -0.0023 | 0.0065  |
| 7 | e | 1 | 3 | 0 | 1 | 2423.4924  | 4.00E-04 | 3   | 2423.4506  | 2423.4941  | 0.0419  | -0.0017 |
| 7 | e | 3 | 0 | 0 | 0 | 2567.2500  | 4.00E-03 | 1   | 2567.1406  | 2567.2588  | 0.1094  | -0.0088 |
| 7 | e | 0 | 1 | 1 | 1 | 2586.6144  | 2.38E-06 | 4   | 2586.6262  | 2586.6109  | -0.0118 | 0.0035  |
| 7 | e | 2 | 2 | 0 | 0 | 2742.7343  | 4.00E-03 | 1   | 2742.6207  | 2742.7401  | 0.1135  | -0.0058 |
| 7 | e | 1 | 0 | 1 | 0 | 2929.3707  | 4.18E-03 | 3   | 2929.3839  | 2929.3862  | -0.0132 | -0.0154 |
| 7 | e | 1 | 4 | 0 | 2 | 2943.6154  | 1.14E-02 | 1   | 2943.7614  | 2943.5648  | -0.1460 | 0.0506  |
| 7 | e | 1 | 4 | 0 | 0 | 2948.4855  | 1.05E-02 | 1   | 2948.4271  | 2948.4904  | 0.0583  | -0.0049 |
| 7 | e | 0 | 2 | 1 | 0 | 3106.8837  | 4.00E-03 | 1   | 3106.9629  | 3106.8644  | -0.0792 | 0.0192  |
| 7 | e | 2 | 4 | 0 | 0 | 3774.1708  | 3.55E-03 | 1   | 3774.2845  | 3774.1100  | -0.1137 | 0.0608  |
| 7 | e | 2 | 0 | 1 | 0 | 3779.7450  | 3.55E-03 | 3   | 3779.8006  | 3779.7346  | -0.0556 | 0.0105  |
| 7 | e | 1 | 2 | 1 | 0 | 3948.7301  | 3.00E-04 | 3   | 3948.6372  | 3948.7216  | 0.0929  | 0.0084  |
| 7 | e | 1 | 6 | 0 | 0 | 4001.5237  | 3.00E-04 | 2   | 4002.7611  | 4001.5288  | -1.2373 | -0.0050 |
| 7 | e | 0 | 0 | 2 | 0 | 4112.6106  | 3.00E-04 | 5   | 4112.5958  | 4112.6127  | 0.0148  | -0.0021 |
| 7 | e | 0 | 4 | 1 | 0 | 4152.5703  | 3.00E-04 | 2   | 4152.6260  | 4152.5747  | -0.0557 | -0.0044 |
| 7 | e | 1 | 3 | 1 | 1 | 4462.0680  | 3.00E-04 | 1   | 4462.0980  | 4462.0710  | -0.0300 | -0.0031 |
| 7 | e | 0 | 1 | 2 | 1 | 4618.3488  | 1.02E-03 | 2   | 4618.3001  | 4618.3510  | 0.0487  | -0.0022 |
| 7 | e | 3 | 0 | 1 | 0 | 4621.0379  | 3.55E-03 | 1   | 4620.9690  | 4621.0598  | 0.0688  | -0.0219 |
| 7 | e | 0 | 5 | 1 | 1 | 4677.4483  | 3.00E-04 | 1   | 4677.6037  | 4677.4498  | -0.1554 | -0.0015 |
| 7 | e | 2 | 2 | 1 | 0 | 4784.4955  | 3.03E-04 | 3   | 4784.4657  | 4784.4685  | 0.0298  | 0.0270  |
| 7 | e | 1 | 0 | 2 | 0 | 4965.0799  | 4.00E-04 | 3   | 4965.0838  | 4965.0922  | -0.0040 | -0.0124 |
| 7 | e | 1 | 4 | 1 | 0 | 4981.7557  | 3.03E-04 | 2   | 4981.5746  | 4981.7509  | 0.1810  | 0.0048  |
| 7 | e | 0 | 2 | 2 | 2 | 5124.6590  | 7.08E-03 | 1   | 5125.0583  | 5124.7947  | -0.3993 | -0.1357 |
| 7 | e | 0 | 2 | 2 | 0 | 5132.2475  | 4.00E-04 | 4   | 5132.2151  | 5132.2538  | 0.0324  | -0.0063 |
| 7 | e | 0 | 6 | 1 | 0 | 5207.3974  | 3.00E-04 | 1   | 5207.7805  | 5207.5399  | -0.3832 | -0.1425 |
| 7 | e | 2 | 3 | 1 | 1 | 5291.8256  | 2.55E-03 | 2   | 5292.0375  | 5291.8377  | -0.2120 | -0.0121 |
| 7 | e | 4 | 0 | 1 | 0 | 5456.1177  | 4.00E-04 | 1   | 5455.9367  | 5456.1143  | 0.1810  | 0.0034  |
| 7 | e | 1 | 1 | 2 | 1 | 5463.6775  | 4.00E-04 | 1   | 5463.3194  | 5463.6667  | 0.3581  | 0.0109  |
| 7 | e | 3 | 2 | 1 | 0 | 5613.7269  | 6.00E-04 | 2   | 5613.9080  | 5613.6037  | -0.1811 | 0.1233  |
| 7 | e | 2 | 4 | 1 | 0 | 5803.2916  | 4.02E-04 | 2   | 5803.4702  | 5803.2772  | -0.1786 | 0.0144  |

|   |   |   |   |   |   |            |          |     |            |            |         |         |
|---|---|---|---|---|---|------------|----------|-----|------------|------------|---------|---------|
| 7 | e | 2 | 0 | 2 | 0 | 5813.0814  | 3.24E-04 | 3   | 5813.0317  | 5813.1176  | 0.0497  | -0.0362 |
| 7 | e | 1 | 2 | 2 | 2 | 5963.5116  | 7.08E-03 | 1   | 5963.5198  | 5963.6179  | -0.0082 | -0.1062 |
| 7 | e | 1 | 2 | 2 | 0 | 5970.5698  | 6.00E-04 | 4   | 5970.4570  | 5970.5558  | 0.1128  | 0.0141  |
| 7 | e | 0 | 0 | 3 | 0 | 6128.7339  | 6.00E-04 | 4   | 6128.7050  | 6128.7348  | 0.0289  | -0.0009 |
| 7 | e | 0 | 4 | 2 | 0 | 6165.9942  | 6.00E-04 | 4   | 6166.1141  | 6166.0030  | -0.1199 | -0.0089 |
| 7 | e | 2 | 1 | 2 | 1 | 6302.1113  | 6.00E-04 | 1   | 6301.7634  | 6302.0214  | 0.3479  | 0.0900  |
| 7 | e | 4 | 2 | 1 | 0 | 6440.3122  | 4.50E-03 | 1   | 6443.4320  | 6440.6608  | -3.1198 | -0.3486 |
| 7 | e | 3 | 4 | 1 | 0 | 6622.3829  | 4.50E-03 | 1   | 6623.3649  | 6622.4396  | -0.9820 | -0.0567 |
| 7 | e | 3 | 0 | 2 | 0 | 6651.2333  | 1.00E-03 | 2   | 6651.1996  | 6651.2285  | 0.0337  | 0.0048  |
| 7 | e | 2 | 2 | 2 | 0 | 6802.7579  | 1.00E-03 | 1   | 6802.9044  | 6802.7053  | -0.1465 | 0.0526  |
| 7 | e | 1 | 0 | 3 | 0 | 6977.3191  | 6.02E-04 | 4   | 6977.3134  | 6977.2946  | 0.0057  | 0.0246  |
| 7 | e | 0 | 2 | 3 | 2 | 7125.9843  | 7.10E-03 | 1   | 7126.3821  | 7126.2295  | -0.3978 | -0.2452 |
| 7 | e | 3 | 5 | 1 | 1 | 7127.7679  | 5.50E-03 | 1   | 7129.1279  | 7127.8481  | -1.3600 | -0.0802 |
| 7 | e | 0 | 2 | 3 | 0 | 7134.5784  | 1.00E-03 | 1   | 7134.3720  | 7134.6360  | 0.2063  | -0.0576 |
| 7 | e | 1 | 1 | 3 | 1 | 7468.5873  | 1.00E-03 | 1   | 7468.1478  | 7468.5487  | 0.4395  | 0.0386  |
| 7 | e | 4 | 0 | 2 | 0 | 7483.2767  | 4.50E-03 | 1   | 7483.3513  | 7483.1992  | -0.0746 | 0.0775  |
| 7 | e | 3 | 2 | 2 | 2 | 7622.5418  | 1.26E-02 | 1   | 7623.0201  | 7622.5050  | -0.4783 | 0.0368  |
| 7 | e | 2 | 4 | 2 | 0 | 7809.2029  | 4.50E-03 | 1   | 7809.4129  | 7809.2708  | -0.2099 | -0.0678 |
| 7 | e | 2 | 0 | 3 | 0 | 7823.0602  | 2.00E-03 | 1   | 7822.9887  | 7823.1005  | 0.0715  | -0.0402 |
| 7 | e | 1 | 2 | 3 | 0 | 7969.2349  | 4.50E-03 | 1   | 7969.0605  | 7969.1623  | 0.1744  | 0.0726  |
| 7 | e | 0 | 0 | 4 | 0 | 8121.8278  | 4.50E-03 | 1   | 8121.8331  | 8121.8355  | -0.0053 | -0.0077 |
| 7 | e | 1 | 0 | 4 | 0 | 8965.9607  | 1.00E-02 | 2   | 8965.8555  | 8965.8926  | 0.1052  | 0.0680  |
| 7 | e | 1 | 2 | 4 | 0 | 9944.6537  | 1.00E-02 | 2   | 9944.5382  | 9944.6350  | 0.1154  | 0.0187  |
| 7 | e | 0 | 0 | 5 | 0 | 10091.9317 | 1.00E-02 | 2   | 10091.8900 | 10091.9022 | 0.0416  | 0.0295  |
| 7 | e | 0 | 4 | 4 | 0 | 10125.1882 | 1.00E-02 | 2   | 10125.1871 | 10125.1777 | 0.0011  | 0.0105  |
| 7 | e | 0 | 1 | 5 | 1 | 10575.3284 | 1.00E-02 | 4   | 10575.2909 | 10575.3146 | 0.0375  | 0.0137  |
| 7 | e | 1 | 0 | 5 | 0 | 10931.0615 | 1.00E-02 | 1   | 10930.6002 | 10930.9560 | 0.4613  | 0.1055  |
| 7 | e | 1 | 4 | 4 | 0 | 10946.0542 | 1.17E-02 | 2   | 10945.7145 | 10946.0660 | 0.3397  | -0.0118 |
| 7 | e | 2 | 4 | 4 | 0 | 11752.1754 | 5.00E-03 | 2   | 11752.0645 | 11752.3934 | 0.1109  | -0.2180 |
| 7 | e | 2 | 0 | 5 | 0 | 11772.9535 | 1.00E-02 | 2   | 11772.9010 | 11772.9031 | 0.0525  | 0.0504  |
| 7 | e | 1 | 2 | 5 | 0 | 11897.1810 | 1.00E-02 | 2   | 11896.9925 | 11897.0767 | 0.1885  | 0.1043  |
| 7 | e | 0 | 0 | 6 | 0 | 12038.8867 | 1.00E-02 | 2   | 12038.7169 | 12038.8873 | 0.1698  | -0.0007 |
| 7 | e | 1 | 3 | 5 | 1 | 12385.2195 | 5.00E-03 | 2   | 12384.4995 | 12385.1070 | 0.7200  | 0.1125  |
| 7 | e | 2 | 2 | 5 | 0 | 12718.0057 | 1.00E-02 | 2   | 12718.6703 | 12717.9233 | -0.6646 | 0.0824  |
| 7 | e | 1 | 1 | 6 | 1 | 13343.2091 | 5.00E-03 | 2   | 13342.9226 | 13343.2122 | 0.2865  | -0.0031 |
| 7 | e | 0 | 0 | 7 | 0 | 13962.7575 | 1.00E-02 | 1   | 13962.1956 | 13962.7304 | 0.5619  | 0.0270  |
| 7 | f | 0 | 1 | 0 | 1 | 531.8077   | 1.64E-06 | 34  | 531.7918   | 531.8075   | 0.0158  | 0.0002  |
| 7 | f | 0 | 2 | 0 | 2 | 1052.6911  | 8.77E-03 | 4   | 1052.7367  | 1052.6896  | -0.0455 | 0.0016  |
| 7 | f | 1 | 1 | 0 | 1 | 1383.8137  | 2.40E-03 | 2   | 1383.7983  | 1383.8171  | 0.0154  | -0.0034 |
| 7 | f | 0 | 3 | 0 | 1 | 1584.7886  | 2.49E-06 | 6   | 1584.7575  | 1584.7854  | 0.0311  | 0.0033  |
| 7 | f | 0 | 4 | 0 | 2 | 2110.9500  | 1.14E-02 | 1   | 2110.9366  | 2110.9561  | 0.0134  | -0.0061 |
| 7 | f | 2 | 1 | 0 | 1 | 2229.3534  | 3.90E-03 | 2   | 2229.3556  | 2229.3469  | -0.0022 | 0.0065  |
| 7 | f | 1 | 3 | 0 | 1 | 2423.5167  | 4.00E-04 | 3   | 2423.4748  | 2423.5185  | 0.0418  | -0.0019 |
| 7 | f | 0 | 1 | 1 | 1 | 2586.6264  | 2.40E-06 | 4   | 2586.6381  | 2586.6229  | -0.0116 | 0.0035  |
| 7 | f | 1 | 4 | 0 | 2 | 2943.6154  | 1.14E-02 | 1   | 2943.7615  | 2943.5649  | -0.1461 | 0.0506  |
| 7 | f | 1 | 3 | 1 | 1 | 4462.0930  | 3.00E-04 | 1   | 4462.1227  | 4462.0962  | -0.0297 | -0.0032 |
| 7 | f | 2 | 3 | 1 | 1 | 5291.8486  | 4.00E-04 | 2   | 5292.0639  | 5291.8647  | -0.2153 | -0.0160 |
| 7 | f | 0 | 1 | 3 | 1 | 6627.0406  | 6.00E-04 | 1   | 6626.9347  | 6627.0482  | 0.1059  | -0.0075 |
| 7 | f | 5 | 1 | 1 | 1 | 6766.7762  | 5.50E-03 | 1   | 6767.0579  | 6766.7142  | -0.2818 | 0.0619  |
| 7 | f | 3 | 5 | 1 | 1 | 7127.8051  | 5.50E-03 | 1   | 7129.1615  | 7127.8844  | -1.3564 | -0.0794 |
| 7 | f | 3 | 2 | 2 | 2 | 7622.5418  | 1.26E-02 | 1   | 7623.0202  | 7622.5051  | -0.4784 | 0.0367  |
| 7 | f | 2 | 1 | 3 | 1 | 8302.9967  | 5.50E-03 | 1   | 8302.7445  | 8302.8717  | 0.2522  | 0.1250  |
| 7 | f | 1 | 3 | 5 | 1 | 12385.2339 | 5.00E-03 | 2   | 12384.5269 | 12385.1365 | 0.7070  | 0.0974  |
| 7 | f | 1 | 1 | 6 | 1 | 13343.2225 | 5.00E-03 | 2   | 13343.1695 | 13343.2313 | 0.0530  | -0.0088 |
| 8 | e | 0 | 0 | 0 | 0 | 14.6055    | 4.41E-07 | 131 | 14.5667    | 14.6043    | 0.0388  | 0.0012  |
| 8 | e | 0 | 1 | 0 | 1 | 535.0454   | 1.64E-06 | 56  | 535.0211   | 535.0449   | 0.0242  | 0.0005  |
| 8 | e | 1 | 0 | 0 | 0 | 873.5288   | 4.34E-05 | 12  | 873.5394   | 873.5217   | -0.0106 | 0.0072  |

|   |   |   |   |   |   |            |          |    |            |            |         |         |
|---|---|---|---|---|---|------------|----------|----|------------|------------|---------|---------|
| 8 | e | 0 | 2 | 0 | 2 | 1055.9488  | 5.00E-03 | 10 | 1055.9850  | 1055.9459  | -0.0362 | 0.0028  |
| 8 | e | 0 | 2 | 0 | 0 | 1061.6925  | 1.09E-06 | 21 | 1061.7358  | 1061.6905  | -0.0434 | 0.0019  |
| 8 | e | 1 | 1 | 0 | 1 | 1387.0401  | 4.40E-03 | 1  | 1387.0168  | 1387.0445  | 0.0233  | -0.0044 |
| 8 | e | 0 | 3 | 0 | 1 | 1588.0223  | 2.49E-06 | 8  | 1587.9826  | 1588.0184  | 0.0397  | 0.0039  |
| 8 | e | 2 | 0 | 0 | 0 | 1725.4938  | 1.20E-04 | 6  | 1725.4906  | 1725.4950  | 0.0032  | -0.0012 |
| 8 | e | 1 | 2 | 0 | 0 | 1906.8428  | 2.50E-02 | 1  | 1906.7378  | 1906.8549  | 0.1049  | -0.0122 |
| 8 | e | 0 | 0 | 1 | 0 | 2076.7189  | 1.46E-06 | 4  | 2076.7178  | 2076.7175  | 0.0011  | 0.0013  |
| 8 | e | 0 | 4 | 0 | 2 | 2114.2157  | 7.12E-03 | 4  | 2114.1924  | 2114.2201  | 0.0233  | -0.0044 |
| 8 | e | 0 | 4 | 0 | 0 | 2119.5133  | 9.00E-05 | 5  | 2119.3645  | 2119.5363  | 0.1488  | -0.0230 |
| 8 | e | 1 | 3 | 0 | 1 | 2426.7484  | 2.85E-02 | 2  | 2426.6895  | 2426.7420  | 0.0589  | 0.0065  |
| 8 | e | 3 | 0 | 0 | 0 | 2570.4635  | 4.00E-03 | 1  | 2570.3459  | 2570.4744  | 0.1176  | -0.0108 |
| 8 | e | 0 | 1 | 1 | 1 | 2589.8448  | 2.92E-06 | 4  | 2589.8480  | 2589.8412  | -0.0032 | 0.0036  |
| 8 | e | 2 | 2 | 0 | 0 | 2745.9729  | 4.00E-03 | 1  | 2745.8490  | 2745.9779  | 0.1239  | -0.0050 |
| 8 | e | 1 | 0 | 1 | 0 | 2932.5883  | 4.21E-03 | 3  | 2932.5919  | 2932.6035  | -0.0036 | -0.0153 |
| 8 | e | 1 | 4 | 0 | 0 | 2951.7943  | 1.51E-03 | 2  | 2951.6727  | 2951.7447  | 0.1215  | 0.0496  |
| 8 | e | 0 | 2 | 1 | 0 | 3110.1206  | 4.00E-03 | 1  | 3110.1903  | 3110.1009  | -0.0698 | 0.0196  |
| 8 | e | 2 | 0 | 1 | 0 | 3782.9753  | 1.00E-01 | 2  | 3783.0056  | 3782.9478  | -0.0304 | 0.0275  |
| 8 | e | 1 | 2 | 1 | 0 | 3951.9594  | 3.00E-04 | 3  | 3951.8560  | 3951.9503  | 0.1034  | 0.0090  |
| 8 | e | 0 | 0 | 2 | 0 | 4115.8175  | 3.00E-04 | 5  | 4115.7945  | 4115.8197  | 0.0230  | -0.0022 |
| 8 | e | 0 | 4 | 1 | 0 | 4155.8156  | 3.00E-04 | 3  | 4155.8614  | 4155.8194  | -0.0458 | -0.0038 |
| 8 | e | 0 | 5 | 1 | 1 | 4680.6927  | 3.00E-04 | 1  | 4680.8382  | 4680.6936  | -0.1455 | -0.0009 |
| 8 | e | 2 | 2 | 1 | 0 | 4787.6783  | 2.50E-02 | 2  | 4787.6761  | 4787.6897  | 0.0022  | -0.0114 |
| 8 | e | 1 | 0 | 2 | 0 | 4968.2800  | 3.03E-04 | 5  | 4968.2741  | 4968.2922  | 0.0059  | -0.0122 |
| 8 | e | 1 | 4 | 1 | 2 | 4978.8539  | 7.08E-03 | 1  | 4979.1808  | 4978.9073  | -0.3269 | -0.0534 |
| 8 | e | 1 | 4 | 1 | 0 | 4984.9915  | 3.03E-04 | 3  | 4984.8005  | 4984.9864  | 0.1909  | 0.0051  |
| 8 | e | 0 | 2 | 2 | 2 | 5127.8782  | 7.08E-03 | 1  | 5128.2680  | 5128.0138  | -0.3898 | -0.1356 |
| 8 | e | 0 | 2 | 2 | 0 | 5135.4659  | 3.00E-04 | 5  | 5135.4235  | 5135.4718  | 0.0424  | -0.0059 |
| 8 | e | 0 | 6 | 1 | 0 | 5210.6504  | 3.00E-04 | 1  | 5211.0230  | 5210.7917  | -0.3726 | -0.1413 |
| 8 | e | 2 | 3 | 1 | 1 | 5295.0455  | 4.00E-04 | 2  | 5295.2493  | 5295.0604  | -0.2038 | -0.0149 |
| 8 | e | 4 | 0 | 1 | 0 | 5459.3057  | 4.00E-04 | 1  | 5459.1130  | 5459.3016  | 0.1927  | 0.0041  |
| 8 | e | 1 | 1 | 2 | 1 | 5466.8812  | 3.27E-04 | 2  | 5466.5131  | 5466.8706  | 0.3681  | 0.0106  |
| 8 | e | 3 | 2 | 1 | 0 | 5616.9436  | 6.00E-04 | 2  | 5617.1126  | 5616.8200  | -0.1690 | 0.1236  |
| 8 | e | 0 | 3 | 2 | 1 | 5648.7260  | 3.11E-03 | 2  | 5649.0570  | 5648.7203  | -0.3310 | 0.0057  |
| 8 | e | 2 | 4 | 1 | 0 | 5806.5193  | 6.00E-04 | 1  | 5806.6850  | 5806.5036  | -0.1657 | 0.0157  |
| 8 | e | 2 | 0 | 2 | 0 | 5816.2742  | 3.23E-04 | 4  | 5816.2153  | 5816.3103  | 0.0589  | -0.0362 |
| 8 | e | 1 | 2 | 2 | 2 | 5966.7244  | 7.08E-03 | 1  | 5966.7213  | 5966.8302  | 0.0031  | -0.1058 |
| 8 | e | 1 | 2 | 2 | 0 | 5973.7817  | 6.00E-04 | 4  | 5973.6572  | 5973.7668  | 0.1244  | 0.0149  |
| 8 | e | 0 | 0 | 3 | 0 | 6131.9216  | 6.00E-04 | 4  | 6131.8850  | 6131.9228  | 0.0366  | -0.0012 |
| 8 | e | 0 | 4 | 2 | 0 | 6169.2210  | 6.00E-04 | 4  | 6169.3302  | 6169.2294  | -0.1092 | -0.0084 |
| 8 | e | 5 | 0 | 1 | 0 | 6287.4158  | 4.50E-03 | 1  | 6287.1015  | 6287.3502  | 0.3143  | 0.0655  |
| 8 | e | 1 | 3 | 2 | 1 | 6480.6071  | 6.00E-04 | 1  | 6480.6250  | 6480.6254  | -0.0178 | -0.0183 |
| 8 | e | 0 | 1 | 3 | 1 | 6630.5193  | 6.00E-04 | 1  | 6630.1063  | 6630.2279  | 0.4130  | 0.2914  |
| 8 | e | 3 | 0 | 2 | 0 | 6654.4131  | 1.00E-03 | 2  | 6654.3684  | 6654.4079  | 0.0446  | 0.0052  |
| 8 | e | 2 | 2 | 2 | 0 | 6805.9631  | 1.00E-03 | 2  | 6806.0975  | 6805.9101  | -0.1343 | 0.0531  |
| 8 | e | 1 | 0 | 3 | 0 | 6980.5040  | 1.00E-03 | 4  | 6980.4876  | 6980.4788  | 0.0164  | 0.0252  |
| 8 | e | 1 | 4 | 2 | 0 | 6995.4322  | 1.00E-03 | 2  | 6995.1296  | 6995.4904  | 0.3026  | -0.0581 |
| 8 | e | 0 | 2 | 3 | 2 | 7129.1858  | 7.10E-03 | 1  | 7129.5728  | 7129.4298  | -0.3870 | -0.2441 |
| 8 | e | 0 | 2 | 3 | 0 | 7137.7772  | 6.00E-04 | 3  | 7137.5615  | 7137.8355  | 0.2158  | -0.0583 |
| 8 | e | 1 | 1 | 3 | 1 | 7471.7722  | 1.00E-03 | 1  | 7471.3231  | 7471.7347  | 0.4491  | 0.0375  |
| 8 | e | 2 | 0 | 3 | 0 | 7826.2336  | 2.00E-03 | 3  | 7826.1527  | 7826.2738  | 0.0809  | -0.0402 |
| 8 | e | 1 | 2 | 3 | 0 | 7972.4382  | 4.50E-03 | 2  | 7972.2426  | 7972.3558  | 0.1955  | 0.0824  |
| 8 | e | 0 | 0 | 4 | 0 | 8124.9974  | 4.50E-03 | 1  | 8124.9948  | 8125.0048  | 0.0025  | -0.0074 |
| 8 | e | 1 | 3 | 3 | 1 | 8472.7639  | 5.50E-03 | 1  | 8472.7125  | 8472.7941  | 0.0513  | -0.0302 |
| 8 | e | 0 | 1 | 4 | 1 | 8615.8507  | 6.50E-03 | 1  | 8615.7384  | 8615.8559  | 0.1122  | -0.0053 |
| 8 | e | 1 | 0 | 4 | 0 | 8969.1288  | 1.00E-02 | 1  | 8969.0161  | 8969.0631  | 0.1126  | 0.0657  |
| 8 | e | 1 | 2 | 4 | 0 | 9947.8203  | 1.00E-02 | 2  | 9947.7027  | 9947.8110  | 0.1176  | 0.0093  |
| 8 | e | 0 | 0 | 5 | 0 | 10095.0863 | 1.00E-02 | 2  | 10095.0344 | 10095.0535 | 0.0519  | 0.0328  |

|   |   |   |   |   |   |            |          |     |            |            |         |         |
|---|---|---|---|---|---|------------|----------|-----|------------|------------|---------|---------|
| 8 | e | 0 | 4 | 4 | 0 | 10128.3803 | 1.00E-02 | 2   | 10128.3642 | 10128.3683 | 0.0161  | 0.0120  |
| 8 | e | 0 | 1 | 5 | 1 | 10578.4894 | 1.00E-02 | 4   | 10578.4374 | 10578.4695 | 0.0520  | 0.0200  |
| 8 | e | 1 | 0 | 5 | 0 | 10934.2268 | 1.00E-02 | 1   | 10933.7490 | 10934.1136 | 0.4777  | 0.1132  |
| 8 | e | 1 | 4 | 4 | 0 | 10949.2138 | 1.00E-02 | 2   | 10948.8730 | 10949.2353 | 0.3408  | -0.0215 |
| 8 | e | 2 | 4 | 4 | 0 | 11755.3338 | 2.08E-02 | 1   | 11755.2316 | 11755.5715 | 0.1021  | -0.2377 |
| 8 | e | 2 | 0 | 5 | 0 | 11776.0933 | 1.00E-02 | 2   | 11776.0279 | 11776.0394 | 0.0654  | 0.0539  |
| 8 | e | 1 | 2 | 5 | 0 | 11900.3368 | 1.00E-02 | 2   | 11900.1401 | 11900.2437 | 0.1967  | 0.0931  |
| 8 | e | 0 | 0 | 6 | 0 | 12042.0208 | 1.00E-02 | 2   | 12041.8452 | 12042.0211 | 0.1756  | -0.0003 |
| 8 | e | 1 | 3 | 5 | 1 | 12388.3708 | 1.46E-02 | 1   | 12387.6492 | 12388.2675 | 0.7216  | 0.1033  |
| 8 | e | 2 | 2 | 5 | 0 | 12721.1548 | 1.00E-02 | 1   | 12721.8148 | 12721.0778 | -0.6600 | 0.0770  |
| 8 | e | 0 | 2 | 6 | 0 | 13007.6728 | 1.08E-02 | 1   | 13006.4017 | 13007.7637 | 1.2711  | -0.0909 |
| 8 | e | 1 | 1 | 6 | 1 | 13346.3528 | 5.00E-03 | 1   | 13346.2800 | 13346.3468 | 0.0728  | 0.0060  |
| 8 | e | 0 | 0 | 7 | 0 | 13965.8633 | 1.00E-02 | 2   | 13965.3150 | 13965.8482 | 0.5482  | 0.0151  |
| 8 | f | 0 | 1 | 0 | 1 | 535.0606   | 1.66E-06 | 37  | 535.0363   | 535.0602   | 0.0243  | 0.0005  |
| 8 | f | 0 | 2 | 0 | 2 | 1055.9488  | 5.00E-03 | 7   | 1055.9850  | 1055.9460  | -0.0362 | 0.0028  |
| 8 | f | 1 | 1 | 0 | 1 | 1387.0587  | 1.30E-04 | 3   | 1387.0331  | 1387.0610  | 0.0255  | -0.0023 |
| 8 | f | 0 | 3 | 0 | 1 | 1588.0521  | 2.50E-06 | 6   | 1588.0122  | 1588.0482  | 0.0399  | 0.0039  |
| 8 | f | 0 | 4 | 0 | 2 | 2114.2138  | 7.12E-03 | 4   | 2114.1925  | 2114.2202  | 0.0212  | -0.0064 |
| 8 | f | 1 | 3 | 0 | 1 | 2426.7639  | 2.85E-02 | 2   | 2426.7207  | 2426.7734  | 0.0432  | -0.0095 |
| 8 | f | 0 | 1 | 1 | 1 | 2589.8603  | 2.93E-06 | 4   | 2589.8633  | 2589.8567  | -0.0029 | 0.0036  |
| 8 | f | 1 | 3 | 1 | 1 | 4465.3311  | 3.00E-04 | 1   | 4465.3500  | 4465.3338  | -0.0189 | -0.0027 |
| 8 | f | 2 | 3 | 1 | 1 | 5295.0786  | 4.00E-04 | 2   | 5295.2832  | 5295.0950  | -0.2046 | -0.0164 |
| 8 | f | 0 | 3 | 2 | 1 | 5648.7576  | 4.00E-04 | 1   | 5649.0871  | 5648.7512  | -0.3295 | 0.0064  |
| 8 | f | 1 | 2 | 2 | 2 | 5966.7246  | 7.08E-03 | 1   | 5966.7213  | 5966.8302  | 0.0033  | -0.1057 |
| 8 | f | 1 | 3 | 2 | 1 | 6480.6398  | 6.00E-04 | 1   | 6480.6573  | 6480.6589  | -0.0176 | -0.0191 |
| 8 | f | 0 | 1 | 4 | 1 | 8615.8698  | 6.50E-03 | 1   | 8615.7543  | 8615.8729  | 0.1154  | -0.0032 |
| 8 | f | 1 | 3 | 5 | 1 | 12388.3827 | 1.46E-02 | 1   | 12387.6844 | 12388.3054 | 0.6983  | 0.0772  |
| 8 | f | 1 | 1 | 6 | 1 | 13346.3647 | 5.00E-03 | 1   | 13346.3107 | 13346.3714 | 0.0539  | -0.0067 |
| 9 | e | 0 | 0 | 0 | 0 | 18.2568    | 4.92E-07 | 137 | 18.2083    | 18.2553    | 0.0485  | 0.0014  |
| 9 | e | 0 | 1 | 0 | 1 | 538.7011   | 1.66E-06 | 47  | 538.6674   | 538.7003   | 0.0337  | 0.0008  |
| 9 | e | 1 | 0 | 0 | 0 | 877.1692   | 4.34E-05 | 15  | 877.1693   | 877.1617   | -0.0001 | 0.0075  |
| 9 | e | 0 | 2 | 0 | 2 | 1059.6127  | 5.00E-03 | 14  | 1059.6394  | 1059.6094  | -0.0267 | 0.0033  |
| 9 | e | 0 | 2 | 0 | 0 | 1065.3550  | 1.11E-06 | 30  | 1065.3885  | 1065.3524  | -0.0336 | 0.0026  |
| 9 | e | 1 | 1 | 0 | 1 | 1390.6878  | 1.30E-04 | 4   | 1390.6519  | 1390.6897  | 0.0359  | -0.0020 |
| 9 | e | 0 | 3 | 0 | 1 | 1591.6862  | 2.50E-06 | 11  | 1591.6366  | 1591.6816  | 0.0496  | 0.0046  |
| 9 | e | 2 | 0 | 0 | 0 | 1729.1231  | 1.17E-04 | 6   | 1729.1086  | 1729.1239  | 0.0145  | -0.0008 |
| 9 | e | 1 | 2 | 0 | 0 | 1910.4958  | 3.34E-04 | 5   | 1910.3801  | 1910.5072  | 0.1158  | -0.0114 |
| 9 | e | 0 | 0 | 1 | 0 | 2080.3486  | 3.56E-03 | 3   | 2080.3378  | 2080.3469  | 0.0109  | 0.0017  |
| 9 | e | 0 | 4 | 0 | 2 | 2117.8884  | 7.12E-03 | 6   | 2117.8553  | 2117.8921  | 0.0332  | -0.0037 |
| 9 | e | 0 | 4 | 0 | 0 | 2123.1846  | 9.00E-05 | 8   | 2123.0260  | 2123.2069  | 0.1587  | -0.0222 |
| 9 | e | 2 | 1 | 0 | 1 | 2236.2066  | 3.90E-03 | 1   | 2236.1870  | 2236.1989  | 0.0196  | 0.0077  |
| 9 | e | 1 | 3 | 0 | 1 | 2430.3960  | 3.53E-03 | 3   | 2430.3333  | 2430.3958  | 0.0627  | 0.0002  |
| 9 | e | 3 | 0 | 0 | 0 | 2574.0815  | 4.00E-03 | 2   | 2573.9519  | 2574.0919  | 0.1296  | -0.0104 |
| 9 | e | 0 | 1 | 1 | 1 | 2593.4789  | 3.52E-03 | 3   | 2593.4725  | 2593.4753  | 0.0064  | 0.0036  |
| 9 | e | 0 | 5 | 0 | 1 | 2653.9404  | 5.00E-03 | 2   | 2653.9105  | 2653.9092  | 0.0299  | 0.0312  |
| 9 | e | 2 | 2 | 0 | 0 | 2749.6162  | 4.00E-03 | 1   | 2749.4808  | 2749.6204  | 0.1354  | -0.0042 |
| 9 | e | 1 | 0 | 1 | 0 | 2936.2082  | 4.85E-03 | 3   | 2936.2009  | 2936.2231  | 0.0073  | -0.0149 |
| 9 | e | 1 | 4 | 0 | 0 | 2955.4560  | 2.67E-04 | 3   | 2955.3240  | 2955.4058  | 0.1320  | 0.0502  |
| 9 | e | 0 | 2 | 1 | 0 | 3113.7620  | 4.00E-03 | 1   | 3113.8212  | 3113.7420  | -0.0592 | 0.0201  |
| 9 | e | 2 | 0 | 1 | 0 | 3786.6001  | 1.00E-01 | 2   | 3786.6114  | 3786.5627  | -0.0113 | 0.0374  |
| 9 | e | 1 | 2 | 1 | 0 | 3955.5923  | 3.00E-04 | 4   | 3955.4770  | 3955.5826  | 0.1152  | 0.0097  |
| 9 | e | 1 | 6 | 0 | 0 | 4008.4556  | 3.00E-04 | 1   | 4009.6729  | 4008.4592  | -1.2172 | -0.0036 |
| 9 | e | 0 | 0 | 2 | 0 | 4119.4252  | 3.00E-04 | 4   | 4119.3931  | 4119.4275  | 0.0321  | -0.0023 |
| 9 | e | 0 | 4 | 1 | 0 | 4159.4663  | 3.00E-04 | 3   | 4159.5012  | 4159.4696  | -0.0349 | -0.0033 |
| 9 | e | 1 | 3 | 1 | 1 | 4468.9336  | 3.00E-04 | 1   | 4468.9409  | 4468.9355  | -0.0073 | -0.0019 |
| 9 | e | 0 | 1 | 2 | 1 | 4625.1734  | 3.00E-04 | 1   | 4625.1057  | 4625.1752  | 0.0677  | -0.0018 |
| 9 | e | 0 | 5 | 1 | 1 | 4684.3426  | 3.00E-04 | 1   | 4684.4769  | 4684.3429  | -0.1344 | -0.0004 |

|   |   |   |   |   |   |            |          |    |            |            |         |         |
|---|---|---|---|---|---|------------|----------|----|------------|------------|---------|---------|
| 9 | e | 2 | 2 | 1 | 0 | 4791.2896  | 2.50E-02 | 2  | 4791.2879  | 4791.3134  | 0.0017  | -0.0238 |
| 9 | e | 1 | 0 | 2 | 0 | 4971.8800  | 4.00E-04 | 4  | 4971.8631  | 4971.8922  | 0.0170  | -0.0122 |
| 9 | e | 1 | 4 | 1 | 2 | 4982.4987  | 7.08E-03 | 1  | 4982.8131  | 4982.5513  | -0.3144 | -0.0526 |
| 9 | e | 1 | 4 | 1 | 0 | 4988.6320  | 3.03E-04 | 3  | 4988.4296  | 4988.6262  | 0.2023  | 0.0057  |
| 9 | e | 0 | 2 | 2 | 2 | 5131.4999  | 7.08E-03 | 1  | 5131.8789  | 5131.6352  | -0.3790 | -0.1353 |
| 9 | e | 0 | 2 | 2 | 0 | 5139.0867  | 3.00E-04 | 5  | 5139.0328  | 5139.0920  | 0.0539  | -0.0053 |
| 9 | e | 0 | 6 | 1 | 0 | 5214.3084  | 3.00E-04 | 2  | 5214.6707  | 5214.4501  | -0.3623 | -0.1417 |
| 9 | e | 2 | 3 | 1 | 1 | 5298.6720  | 5.78E-04 | 2  | 5298.8626  | 5298.6859  | -0.1906 | -0.0139 |
| 9 | e | 4 | 0 | 1 | 0 | 5462.8917  | 4.00E-04 | 2  | 5462.6863  | 5462.8873  | 0.2054  | 0.0045  |
| 9 | e | 1 | 1 | 2 | 1 | 5470.4858  | 4.65E-04 | 2  | 5470.1059  | 5470.4750  | 0.3799  | 0.0108  |
| 9 | e | 3 | 2 | 1 | 0 | 5620.5622  | 6.00E-04 | 1  | 5620.7177  | 5620.4383  | -0.1555 | 0.1239  |
| 9 | e | 0 | 3 | 2 | 1 | 5652.3490  | 4.00E-04 | 1  | 5652.6678  | 5652.3425  | -0.3188 | 0.0065  |
| 9 | e | 2 | 4 | 1 | 0 | 5810.1493  | 4.02E-04 | 3  | 5810.3015  | 5810.1333  | -0.1522 | 0.0160  |
| 9 | e | 2 | 0 | 2 | 0 | 5819.8663  | 3.22E-04 | 3  | 5819.7968  | 5819.9021  | 0.0696  | -0.0358 |
| 9 | e | 1 | 2 | 2 | 0 | 5977.3946  | 6.00E-04 | 4  | 5977.2575  | 5977.3792  | 0.1371  | 0.0154  |
| 9 | e | 1 | 6 | 1 | 0 | 6030.3108  | 4.10E-03 | 1  | 6031.0589  | 6030.6731  | -0.7481 | -0.3623 |
| 9 | e | 0 | 0 | 3 | 0 | 6135.5080  | 4.02E-04 | 6  | 6135.4624  | 6135.5092  | 0.0456  | -0.0012 |
| 9 | e | 0 | 4 | 2 | 0 | 6172.8512  | 6.00E-04 | 4  | 6172.9483  | 6172.8590  | -0.0971 | -0.0079 |
| 9 | e | 1 | 3 | 2 | 1 | 6484.2217  | 6.00E-04 | 1  | 6484.2269  | 6484.2398  | -0.0052 | -0.0181 |
| 9 | e | 3 | 4 | 1 | 0 | 6629.2313  | 4.50E-03 | 1  | 6630.1901  | 6629.2893  | -0.9587 | -0.0579 |
| 9 | e | 3 | 0 | 2 | 0 | 6657.9901  | 1.00E-03 | 2  | 6657.9333  | 6657.9847  | 0.0568  | 0.0054  |
| 9 | e | 5 | 1 | 1 | 1 | 6773.5297  | 6.50E-03 | 1  | 6773.7838  | 6773.4646  | -0.2541 | 0.0651  |
| 9 | e | 2 | 2 | 2 | 0 | 6809.5697  | 1.00E-03 | 1  | 6809.6896  | 6809.5154  | -0.1198 | 0.0543  |
| 9 | e | 4 | 3 | 1 | 1 | 6939.9776  | 8.50E-03 | 1  | 6941.7023  | 6939.9541  | -1.7248 | 0.0234  |
| 9 | e | 1 | 0 | 3 | 0 | 6984.0862  | 1.00E-03 | 4  | 6984.0585  | 6984.0610  | 0.0278  | 0.0252  |
| 9 | e | 1 | 4 | 2 | 0 | 6999.0483  | 1.00E-03 | 2  | 6998.7352  | 6999.1072  | 0.3131  | -0.0589 |
| 9 | e | 6 | 0 | 1 | 0 | 7112.0410  | 6.50E-03 | 1  | 7111.6059  | 7111.8735  | 0.4350  | 0.1675  |
| 9 | e | 0 | 2 | 3 | 2 | 7132.7861  | 7.10E-03 | 2  | 7133.1624  | 7133.0302  | -0.3763 | -0.2441 |
| 9 | e | 0 | 2 | 3 | 0 | 7141.3782  | 1.00E-03 | 1  | 7141.1496  | 7141.4350  | 0.2286  | -0.0568 |
| 9 | e | 1 | 1 | 3 | 1 | 7475.3569  | 1.00E-03 | 1  | 7474.8954  | 7475.3190  | 0.4616  | 0.0379  |
| 9 | e | 4 | 0 | 2 | 0 | 7490.0116  | 4.50E-03 | 1  | 7490.5506  | 7489.9339  | -0.5390 | 0.0777  |
| 9 | e | 2 | 4 | 2 | 0 | 7816.0278  | 4.50E-03 | 1  | 7816.2099  | 7816.0936  | -0.1821 | -0.0658 |
| 9 | e | 2 | 0 | 3 | 0 | 7829.8042  | 2.00E-03 | 2  | 7829.7122  | 7829.8437  | 0.0920  | -0.0396 |
| 9 | e | 1 | 2 | 3 | 0 | 7976.0423  | 4.50E-03 | 1  | 7975.8224  | 7975.9485  | 0.2198  | 0.0938  |
| 9 | e | 0 | 0 | 4 | 0 | 8128.5643  | 4.50E-03 | 1  | 8128.5517  | 8128.5702  | 0.0125  | -0.0059 |
| 9 | e | 1 | 3 | 3 | 1 | 8476.3612  | 5.50E-03 | 1  | 8476.2942  | 8476.3888  | 0.0670  | -0.0276 |
| 9 | e | 0 | 1 | 4 | 1 | 8619.4206  | 6.50E-03 | 1  | 8619.2990  | 8619.4262  | 0.1216  | -0.0056 |
| 9 | e | 3 | 0 | 3 | 0 | 8664.5067  | 5.50E-03 | 1  | 8664.5576  | 8664.4601  | -0.0509 | 0.0466  |
| 9 | e | 1 | 0 | 4 | 0 | 8972.7135  | 1.00E-02 | 1  | 8972.5718  | 8972.6297  | 0.1417  | 0.0838  |
| 9 | e | 1 | 2 | 4 | 0 | 9951.4001  | 1.00E-02 | 2  | 9951.2627  | 9951.3839  | 0.1374  | 0.0162  |
| 9 | e | 0 | 0 | 5 | 0 | 10098.6321 | 1.00E-02 | 2  | 10098.5717 | 10098.5988 | 0.0604  | 0.0333  |
| 9 | e | 0 | 4 | 4 | 0 | 10131.9711 | 1.00E-02 | 2  | 10131.9384 | 10131.9578 | 0.0327  | 0.0133  |
| 9 | e | 0 | 1 | 5 | 1 | 10582.0451 | 1.00E-02 | 5  | 10581.9772 | 10582.0187 | 0.0679  | 0.0264  |
| 9 | e | 1 | 0 | 5 | 0 | 10937.7786 | 1.00E-02 | 2  | 10937.2913 | 10937.6658 | 0.4872  | 0.1128  |
| 9 | e | 1 | 4 | 4 | 0 | 10952.7791 | 1.00E-02 | 2  | 10952.4262 | 10952.8008 | 0.3528  | -0.0217 |
| 9 | e | 0 | 2 | 5 | 0 | 11077.2337 | 2.26E-02 | 1  | 11076.4727 | 11077.3410 | 0.7610  | -0.1073 |
| 9 | e | 2 | 0 | 5 | 0 | 11779.6203 | 1.00E-02 | 2  | 11779.5457 | 11779.5676 | 0.0747  | 0.0527  |
| 9 | e | 1 | 2 | 5 | 0 | 11903.8966 | 1.00E-02 | 2  | 11903.6810 | 11903.8021 | 0.2156  | 0.0945  |
| 9 | e | 0 | 0 | 6 | 0 | 12045.5466 | 1.00E-02 | 2  | 12045.3645 | 12045.5465 | 0.1821  | 0.0001  |
| 9 | e | 1 | 3 | 5 | 1 | 12391.9416 | 1.31E-02 | 2  | 12391.1927 | 12391.8232 | 0.7489  | 0.1184  |
| 9 | e | 2 | 2 | 5 | 0 | 12724.7065 | 1.00E-02 | 1  | 12725.3524 | 12724.6266 | -0.6460 | 0.0799  |
| 9 | e | 0 | 2 | 6 | 0 | 13011.2055 | 1.00E-02 | 1  | 13009.9300 | 13011.3043 | 1.2755  | -0.0989 |
| 9 | e | 1 | 1 | 6 | 1 | 13349.8831 | 5.00E-03 | 2  | 13349.8068 | 13349.8731 | 0.0763  | 0.0101  |
| 9 | e | 0 | 0 | 7 | 0 | 13969.3806 | 1.00E-02 | 2  | 13968.8230 | 13969.3556 | 0.5576  | 0.0250  |
| 9 | f | 0 | 1 | 0 | 1 | 538.7202   | 1.67E-06 | 36 | 538.6863   | 538.7194   | 0.0339  | 0.0008  |
| 9 | f | 0 | 2 | 0 | 2 | 1059.6128  | 5.00E-03 | 10 | 1059.6394  | 1059.6094  | -0.0267 | 0.0033  |
| 9 | f | 1 | 1 | 0 | 1 | 1390.7093  | 3.01E-04 | 4  | 1390.6723  | 1390.7102  | 0.0370  | -0.0009 |

|    |   |   |   |   |   |            |          |     |            |            |         |         |
|----|---|---|---|---|---|------------|----------|-----|------------|------------|---------|---------|
| 9  | f | 0 | 3 | 0 | 1 | 1591.7234  | 2.51E-06 | 9   | 1591.6736  | 1591.7189  | 0.0498  | 0.0045  |
| 9  | f | 0 | 4 | 0 | 2 | 2117.8866  | 7.12E-03 | 6   | 2117.8555  | 2117.8923  | 0.0311  | -0.0057 |
| 9  | f | 2 | 1 | 0 | 1 | 2236.2285  | 3.90E-03 | 1   | 2236.2088  | 2236.2208  | 0.0197  | 0.0077  |
| 9  | f | 1 | 3 | 0 | 1 | 2430.4181  | 2.85E-02 | 3   | 2430.3723  | 2430.4351  | 0.0458  | -0.0170 |
| 9  | f | 0 | 1 | 1 | 1 | 2593.4985  | 3.52E-03 | 2   | 2593.4915  | 2593.4947  | 0.0070  | 0.0038  |
| 9  | f | 0 | 5 | 0 | 1 | 2653.9946  | 5.00E-03 | 1   | 2653.9649  | 2653.9638  | 0.0298  | 0.0308  |
| 9  | f | 1 | 3 | 1 | 1 | 4468.9738  | 3.00E-04 | 1   | 4468.9806  | 4468.9760  | -0.0067 | -0.0021 |
| 9  | f | 2 | 3 | 1 | 1 | 5298.7139  | 4.00E-04 | 2   | 5298.9049  | 5298.7292  | -0.1911 | -0.0153 |
| 9  | f | 0 | 3 | 2 | 1 | 5652.3881  | 4.00E-04 | 1   | 5652.7055  | 5652.3812  | -0.3174 | 0.0069  |
| 9  | f | 1 | 2 | 2 | 2 | 5970.3392  | 7.08E-03 | 1   | 5970.3229  | 5970.4440  | 0.0163  | -0.1049 |
| 9  | f | 1 | 3 | 2 | 1 | 6484.2635  | 6.00E-04 | 1   | 6484.2674  | 6484.2816  | -0.0039 | -0.0181 |
| 9  | f | 0 | 1 | 3 | 1 | 6633.8322  | 6.00E-04 | 1   | 6633.7073  | 6633.8399  | 0.1249  | -0.0076 |
| 9  | f | 0 | 2 | 3 | 2 | 7132.7863  | 7.10E-03 | 1   | 7133.1624  | 7133.0302  | -0.3761 | -0.2440 |
| 9  | f | 0 | 1 | 4 | 1 | 8619.4419  | 6.50E-03 | 1   | 8619.3189  | 8619.4475  | 0.1231  | -0.0055 |
| 9  | f | 0 | 1 | 5 | 1 | 10582.0643 | 1.35E-02 | 1   | 10581.9978 | 10582.0410 | 0.0666  | 0.0234  |
| 9  | f | 1 | 3 | 5 | 1 | 12391.9590 | 1.31E-02 | 2   | 12391.2366 | 12391.8705 | 0.7225  | 0.0885  |
| 9  | f | 1 | 1 | 6 | 1 | 13349.9039 | 5.00E-03 | 2   | 13349.8454 | 13349.9061 | 0.0585  | -0.0022 |
| 10 | e | 0 | 0 | 0 | 0 | 22.3137    | 5.39E-07 | 139 | 22.2545    | 22.3119    | 0.0592  | 0.0018  |
| 10 | e | 0 | 1 | 0 | 1 | 542.7630   | 1.67E-06 | 47  | 542.7187   | 542.7618   | 0.0443  | 0.0012  |
| 10 | e | 1 | 0 | 0 | 0 | 881.2141   | 4.34E-05 | 20  | 881.2024   | 881.2062   | 0.0116  | 0.0079  |
| 10 | e | 0 | 2 | 0 | 2 | 1063.6837  | 5.00E-03 | 12  | 1063.6997  | 1063.6798  | -0.0161 | 0.0039  |
| 10 | e | 0 | 2 | 0 | 0 | 1069.4245  | 1.13E-06 | 26  | 1069.4471  | 1069.4212  | -0.0226 | 0.0033  |
| 10 | e | 1 | 1 | 0 | 1 | 1394.7384  | 1.30E-04 | 9   | 1394.6908  | 1394.7399  | 0.0476  | -0.0015 |
| 10 | e | 0 | 3 | 0 | 1 | 1595.7572  | 2.51E-06 | 10  | 1595.6967  | 1595.7518  | 0.0605  | 0.0054  |
| 10 | e | 2 | 0 | 0 | 0 | 1733.1556  | 1.17E-04 | 7   | 1733.1285  | 1733.1560  | 0.0271  | -0.0004 |
| 10 | e | 1 | 2 | 0 | 0 | 1914.5548  | 3.34E-04 | 6   | 1914.4270  | 1914.5653  | 0.1277  | -0.0105 |
| 10 | e | 0 | 0 | 1 | 0 | 2084.3813  | 3.56E-03 | 6   | 2084.3599  | 2084.3796  | 0.0214  | 0.0017  |
| 10 | e | 0 | 4 | 0 | 2 | 2121.9692  | 7.12E-03 | 6   | 2121.9251  | 2121.9721  | 0.0441  | -0.0029 |
| 10 | e | 0 | 4 | 0 | 0 | 2127.2639  | 9.00E-05 | 10  | 2127.0943  | 2127.2853  | 0.1696  | -0.0214 |
| 10 | e | 2 | 1 | 0 | 1 | 2240.2447  | 3.90E-03 | 2   | 2240.2134  | 2240.2374  | 0.0313  | 0.0073  |
| 10 | e | 1 | 3 | 0 | 1 | 2434.4567  | 3.53E-03 | 3   | 2434.3820  | 2434.4556  | 0.0747  | 0.0010  |
| 10 | e | 3 | 0 | 0 | 0 | 2578.1021  | 3.90E-03 | 4   | 2577.9585  | 2578.1114  | 0.1436  | -0.0093 |
| 10 | e | 0 | 1 | 1 | 1 | 2597.5175  | 4.00E-03 | 2   | 2597.4996  | 2597.5132  | 0.0179  | 0.0043  |
| 10 | e | 0 | 5 | 0 | 1 | 2658.0181  | 5.00E-03 | 1   | 2657.9773  | 2657.9861  | 0.0408  | 0.0320  |
| 10 | e | 2 | 2 | 0 | 0 | 2753.6641  | 3.37E-04 | 3   | 2753.5161  | 2753.6676  | 0.1480  | -0.0035 |
| 10 | e | 1 | 0 | 1 | 0 | 2940.2280  | 4.00E-03 | 2   | 2940.2108  | 2940.2447  | 0.0172  | -0.0167 |
| 10 | e | 1 | 4 | 0 | 0 | 2959.5177  | 1.43E-02 | 2   | 2959.3810  | 2959.4736  | 0.1367  | 0.0441  |
| 10 | e | 0 | 2 | 1 | 0 | 3117.8081  | 4.00E-03 | 1   | 3117.8555  | 3117.7875  | -0.0474 | 0.0206  |
| 10 | e | 2 | 0 | 1 | 0 | 3790.5918  | 3.55E-03 | 3   | 3790.6178  | 3790.5793  | -0.0261 | 0.0124  |
| 10 | e | 1 | 2 | 1 | 0 | 3959.6410  | 1.00E-01 | 2   | 3959.5004  | 3959.6185  | 0.1406  | 0.0226  |
| 10 | e | 1 | 6 | 0 | 0 | 4012.5329  | 3.00E-04 | 1   | 4013.7386  | 4012.5359  | -1.2058 | -0.0031 |
| 10 | e | 0 | 0 | 2 | 0 | 4123.4337  | 3.00E-04 | 3   | 4123.3914  | 4123.4362  | 0.0423  | -0.0025 |
| 10 | e | 0 | 4 | 1 | 0 | 4163.5227  | 3.00E-04 | 4   | 4163.5454  | 4163.5254  | -0.0227 | -0.0027 |
| 10 | e | 1 | 3 | 1 | 1 | 4472.9719  | 3.00E-04 | 1   | 4472.9661  | 4472.9734  | 0.0058  | -0.0015 |
| 10 | e | 0 | 1 | 2 | 1 | 4629.1835  | 3.00E-04 | 1   | 4629.1089  | 4629.1894  | 0.0745  | -0.0060 |
| 10 | e | 0 | 5 | 1 | 1 | 4688.3977  | 3.00E-04 | 2   | 4688.5200  | 4688.3977  | -0.1223 | 0.0001  |
| 10 | e | 2 | 2 | 1 | 0 | 4795.3315  | 2.50E-02 | 2   | 4795.3009  | 4795.3398  | 0.0307  | -0.0083 |
| 10 | e | 1 | 0 | 2 | 0 | 4975.8801  | 3.03E-04 | 5   | 4975.8508  | 4975.8921  | 0.0294  | -0.0119 |
| 10 | e | 1 | 4 | 1 | 2 | 4986.5485  | 7.08E-03 | 1   | 4986.8489  | 4986.6002  | -0.3004 | -0.0517 |
| 10 | e | 1 | 4 | 1 | 0 | 4992.6767  | 3.03E-04 | 3   | 4992.4620  | 4992.6706  | 0.2147  | 0.0061  |
| 10 | e | 0 | 2 | 2 | 0 | 5143.1097  | 4.00E-04 | 4   | 5143.0431  | 5143.1144  | 0.0666  | -0.0047 |
| 10 | e | 2 | 3 | 1 | 1 | 5302.7004  | 4.00E-04 | 2   | 5302.8773  | 5302.7142  | -0.1768 | -0.0137 |
| 10 | e | 4 | 0 | 1 | 0 | 5466.8761  | 4.00E-04 | 2   | 5466.6566  | 5466.8713  | 0.2195  | 0.0048  |
| 10 | e | 1 | 1 | 2 | 1 | 5474.4919  | 4.00E-04 | 1   | 5474.0979  | 5474.4798  | 0.3940  | 0.0120  |
| 10 | e | 0 | 3 | 2 | 1 | 5656.3744  | 3.00E-04 | 2   | 5656.6799  | 5656.3672  | -0.3055 | 0.0072  |
| 10 | e | 2 | 4 | 1 | 0 | 5814.1829  | 6.00E-04 | 1   | 5814.3198  | 5814.1662  | -0.1369 | 0.0167  |
| 10 | e | 2 | 0 | 2 | 0 | 5823.8575  | 6.00E-04 | 2   | 5823.7763  | 5823.8930  | 0.0812  | -0.0355 |

|    |   |   |   |   |   |            |          |    |            |            |         |         |
|----|---|---|---|---|---|------------|----------|----|------------|------------|---------|---------|
| 10 | e | 1 | 2 | 2 | 2 | 5974.3548  | 7.08E-03 | 1  | 5974.3246  | 5974.4593  | 0.0303  | -0.1044 |
| 10 | e | 1 | 2 | 2 | 0 | 5981.4097  | 4.00E-04 | 6  | 5981.2577  | 5981.3929  | 0.1520  | 0.0168  |
| 10 | e | 0 | 0 | 3 | 0 | 6139.4927  | 4.02E-04 | 5  | 6139.4373  | 6139.4941  | 0.0555  | -0.0014 |
| 10 | e | 0 | 4 | 2 | 0 | 6176.8846  | 6.00E-04 | 4  | 6176.9684  | 6176.8920  | -0.0837 | -0.0073 |
| 10 | e | 1 | 3 | 2 | 1 | 6488.2384  | 6.00E-04 | 1  | 6488.2291  | 6488.2558  | 0.0094  | -0.0174 |
| 10 | e | 3 | 4 | 1 | 0 | 6633.2627  | 4.50E-03 | 1  | 6634.2048  | 6633.3185  | -0.9421 | -0.0558 |
| 10 | e | 3 | 0 | 2 | 0 | 6661.9647  | 6.02E-04 | 3  | 6661.8943  | 6661.9588  | 0.0704  | 0.0059  |
| 10 | e | 2 | 2 | 2 | 0 | 6813.5769  | 1.00E-03 | 1  | 6813.6807  | 6813.5213  | -0.1038 | 0.0556  |
| 10 | e | 1 | 0 | 3 | 0 | 6988.0668  | 1.00E-03 | 3  | 6988.0261  | 6988.0411  | 0.0407  | 0.0257  |
| 10 | e | 1 | 4 | 2 | 0 | 7003.0690  | 1.00E-03 | 1  | 7002.7414  | 7003.1260  | 0.3276  | -0.0569 |
| 10 | e | 3 | 5 | 1 | 1 | 7138.6283  | 5.50E-03 | 1  | 7139.9327  | 7138.7019  | -1.3044 | -0.0735 |
| 10 | e | 0 | 2 | 3 | 0 | 7145.3775  | 6.00E-04 | 3  | 7145.1363  | 7145.4344  | 0.2412  | -0.0569 |
| 10 | e | 4 | 0 | 2 | 0 | 7493.9731  | 4.50E-03 | 1  | 7494.0107  | 7493.8954  | -0.0375 | 0.0778  |
| 10 | e | 3 | 2 | 2 | 2 | 7633.3485  | 8.96E-03 | 1  | 7633.7786  | 7633.3091  | -0.4301 | 0.0394  |
| 10 | e | 2 | 0 | 3 | 0 | 7833.7714  | 2.00E-03 | 2  | 7833.6672  | 7833.8103  | 0.1042  | -0.0389 |
| 10 | e | 1 | 2 | 3 | 0 | 7980.0524  | 4.50E-03 | 2  | 7979.8000  | 7979.9404  | 0.2524  | 0.1121  |
| 10 | e | 0 | 0 | 4 | 0 | 8132.5264  | 4.50E-03 | 2  | 8132.5038  | 8132.5317  | 0.0226  | -0.0053 |
| 10 | e | 1 | 3 | 3 | 1 | 8480.3543  | 5.50E-03 | 1  | 8480.2739  | 8480.3830  | 0.0804  | -0.0287 |
| 10 | e | 3 | 0 | 3 | 0 | 8668.4618  | 5.50E-03 | 1  | 8668.4962  | 8668.4128  | -0.0344 | 0.0490  |
| 10 | e | 1 | 0 | 4 | 0 | 8976.6643  | 1.00E-02 | 1  | 8976.5224  | 8976.5925  | 0.1420  | 0.0718  |
| 10 | e | 1 | 2 | 4 | 0 | 9955.3842  | 1.00E-02 | 2  | 9955.2181  | 9955.3538  | 0.1661  | 0.0304  |
| 10 | e | 0 | 0 | 5 | 0 | 10102.5715 | 1.00E-02 | 3  | 10102.5020 | 10102.5371 | 0.0695  | 0.0344  |
| 10 | e | 0 | 4 | 4 | 0 | 10135.9599 | 1.00E-02 | 3  | 10135.9097 | 10135.9461 | 0.0502  | 0.0138  |
| 10 | e | 0 | 1 | 5 | 1 | 10585.9891 | 1.00E-02 | 4  | 10585.9102 | 10585.9622 | 0.0788  | 0.0269  |
| 10 | e | 1 | 0 | 5 | 0 | 10941.7235 | 1.00E-02 | 2  | 10941.2271 | 10941.6125 | 0.4964  | 0.1111  |
| 10 | e | 1 | 4 | 4 | 0 | 10956.7390 | 1.00E-02 | 2  | 10956.3744 | 10956.7625 | 0.3646  | -0.0235 |
| 10 | e | 0 | 2 | 5 | 0 | 11081.1543 | 1.23E-02 | 1  | 11080.4137 | 11081.2948 | 0.7407  | -0.1405 |
| 10 | e | 2 | 4 | 4 | 0 | 11762.9102 | 1.46E-02 | 2  | 11762.7534 | 11763.1193 | 0.1568  | -0.2091 |
| 10 | e | 2 | 0 | 5 | 0 | 11783.5425 | 1.00E-02 | 2  | 11783.4543 | 11783.4878 | 0.0883  | 0.0547  |
| 10 | e | 1 | 2 | 5 | 0 | 11907.8484 | 1.00E-02 | 2  | 11907.6154 | 11907.7535 | 0.2331  | 0.0949  |
| 10 | e | 0 | 0 | 6 | 0 | 12049.4590 | 1.00E-02 | 2  | 12049.2748 | 12049.4636 | 0.1842  | -0.0045 |
| 10 | e | 1 | 3 | 5 | 1 | 12395.9231 | 2.00E-02 | 1  | 12395.1298 | 12395.7738 | 0.7933  | 0.1493  |
| 10 | e | 2 | 2 | 5 | 0 | 12728.6518 | 1.00E-02 | 1  | 12729.2831 | 12728.5697 | -0.6313 | 0.0821  |
| 10 | e | 1 | 1 | 6 | 1 | 13353.8151 | 5.00E-03 | 2  | 13353.7268 | 13353.7914 | 0.0883  | 0.0237  |
| 10 | e | 0 | 0 | 7 | 0 | 13973.2855 | 1.00E-02 | 2  | 13972.7206 | 13973.2527 | 0.5650  | 0.0329  |
| 10 | f | 0 | 1 | 0 | 1 | 542.7863   | 1.69E-06 | 36 | 542.7419   | 542.7852   | 0.0445  | 0.0012  |
| 10 | f | 0 | 2 | 0 | 2 | 1063.6838  | 5.00E-03 | 9  | 1063.6998  | 1063.6799  | -0.0161 | 0.0039  |
| 10 | f | 1 | 1 | 0 | 1 | 1394.7633  | 3.00E-04 | 7  | 1394.7157  | 1394.7650  | 0.0476  | -0.0016 |
| 10 | f | 0 | 3 | 0 | 1 | 1595.8026  | 2.52E-06 | 12 | 1595.7418  | 1595.7973  | 0.0608  | 0.0053  |
| 10 | f | 0 | 4 | 0 | 2 | 2121.9675  | 7.12E-03 | 6  | 2121.9253  | 2121.9724  | 0.0421  | -0.0049 |
| 10 | f | 2 | 1 | 0 | 1 | 2240.2716  | 3.90E-03 | 2  | 2240.2401  | 2240.2642  | 0.0315  | 0.0074  |
| 10 | f | 1 | 3 | 0 | 1 | 2434.4875  | 2.85E-02 | 3  | 2434.4296  | 2434.5037  | 0.0579  | -0.0162 |
| 10 | f | 0 | 1 | 1 | 1 | 2597.5419  | 4.30E-03 | 1  | 2597.5230  | 2597.5369  | 0.0189  | 0.0050  |
| 10 | f | 0 | 5 | 0 | 1 | 2658.0836  | 5.00E-03 | 2  | 2658.0438  | 2658.0529  | 0.0398  | 0.0307  |
| 10 | f | 1 | 3 | 1 | 1 | 4473.0215  | 3.00E-04 | 1  | 4473.0146  | 4473.0228  | 0.0069  | -0.0013 |
| 10 | f | 2 | 3 | 1 | 1 | 5302.7537  | 7.39E-04 | 2  | 5302.9290  | 5302.7670  | -0.1753 | -0.0134 |
| 10 | f | 0 | 3 | 2 | 1 | 5656.4215  | 4.00E-04 | 1  | 5656.7259  | 5656.4145  | -0.3044 | 0.0070  |
| 10 | f | 1 | 2 | 2 | 2 | 5974.3550  | 7.08E-03 | 1  | 5974.3247  | 5974.4594  | 0.0303  | -0.1044 |
| 10 | f | 1 | 3 | 2 | 1 | 6488.2894  | 6.00E-04 | 1  | 6488.2785  | 6488.3069  | 0.0109  | -0.0175 |
| 10 | f | 4 | 3 | 1 | 1 | 6944.0613  | 4.50E-03 | 1  | 6945.7637  | 6944.0366  | -1.7024 | 0.0246  |
| 10 | f | 3 | 5 | 1 | 1 | 7138.6998  | 5.50E-03 | 1  | 7139.9984  | 7138.7731  | -1.2986 | -0.0734 |
| 10 | f | 1 | 3 | 3 | 1 | 8480.4100  | 5.50E-03 | 1  | 8480.3245  | 8480.4359  | 0.0854  | -0.0259 |
| 10 | f | 1 | 3 | 5 | 1 | 12395.9422 | 2.00E-02 | 1  | 12395.1834 | 12395.8317 | 0.7588  | 0.1105  |
| 10 | f | 1 | 1 | 6 | 1 | 13353.8386 | 5.00E-03 | 2  | 13353.7745 | 13353.8285 | 0.0641  | 0.0101  |
